# Supplementary material for: Rhodium-catalyzed oxidative C2-acylation of indoles with aryl and alkyl aldehydes
Source: Royal Society of Chemistry journal article supplement (doi:10.1039/c2cc31351k), 2012-01-01

# Rhodium-Catalyzed Oxidative C2-Acylation of Indoles with Aryl and Alkyl Aldehydes

Bing Zhou<sup>†</sup>, Yaxi Yang<sup>†</sup>, Yuanchao Li\*

<sup>†</sup>Those authors contributed equally.

*Shanghai Institute of Materia Medica, Chinese Academy of Sciences, 555 Road Zu Chong Zhi,*

*Zhangjiang Hi-Tech Park, Shanghai 201203, PR China.*

[ycli@mail.shcnc.ac.cn](mailto:ycli@mail.shcnc.ac.cn)

## Table of contents:

|                                                             |    |
|-------------------------------------------------------------|----|
| General Methods                                             | 1  |
| Experimental Procedures and Characterizations               | 2  |
| <sup>1</sup> H and <sup>13</sup> C NMR Spectra of Compounds | 13 |

### ***General methods:***

Mass spectra and high-resolution mass spectra were measured on a Finnigan MAT-95 mass spectrometer. <sup>1</sup>H and <sup>13</sup>C NMR spectra were determined on Bruker AM-300, Bruker AM-400 instruments using tetramethylsilane as internal reference. Data are presented as follows: chemical shift, multiplicity (s = singlet, br s = broad singlet, d = doublet, br d = broad doublet, t = triplet, m = multiplet), *J* = coupling constant in hertz (Hz). Silica gel 60H (200-300 mesh) manufactured by Qingdao Haiyang Chemical Group Co. (China) was used for general chromatography.

### Experimental Procedures and Characterizations:

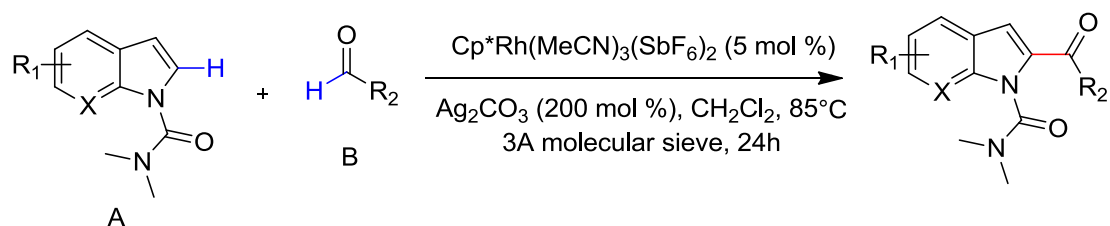

An oven-dried reaction vessel was charged with Cp\*Rh(MeCN)<sub>3</sub>(SbF<sub>6</sub>)<sub>2</sub> (8.4 mg, 5 mol%, 0.01 mmol), CH<sub>2</sub>Cl<sub>2</sub> (2 mL), substrate A (0.2 mmol), substrate B (0.4 mol), 3Å molecular sieves (50mg) and Ag<sub>2</sub>CO<sub>3</sub> (0.4 mol). The vessel was sealed and heated at 85 °C (oil bath temperature) for 24 h. The resulting mixture was cooled to room temperature, filtered through a short silica gel pad and transferred to silica gel column directly to give product.

### *N,N*-Dimethyl-2-Benzoyl-1H-indole-1-carboxamide (3a)

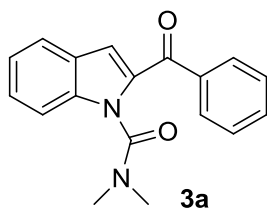

Yield: 93%. <sup>1</sup>H NMR (400MHz, CDCl<sub>3</sub>) δ 3.09 (brs, 6H), 7.15 (s, 1H), 7.23 (td, *J* = 7.2, 2 Hz, 1H), 7.41-7.44 (m, 2H), 7.52 (t, *J* = 7.6 Hz, 2H), 7.61 (tt, *J* = 7.6, 1.6Hz, 1H), 7.70 (d, *J* = 8 Hz, 1H), 7.99 (m, 2H); <sup>13</sup>C NMR (100 MHz, CDCl<sub>3</sub>) δ 37.5, 111.4, 115.6, 122.1, 123.3, 126.7, 127.1, 128.4, 129.5, 132.7, 135.3, 137.3, 137.6, 153.6, 186.3; HRMS (EI) Calcd for C<sub>18</sub>H<sub>16</sub>N<sub>2</sub>O<sub>2</sub> [M]<sup>+</sup> 292.1212, found 292.1208.

### *N,N*-Dimethyl-2-(4-methylbenzoyl)-1H-indole-1-carboxamide (3g)

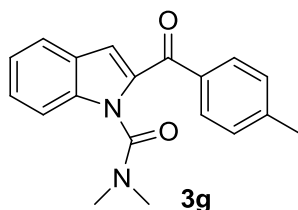

Yield: 92%. <sup>1</sup>H NMR (400MHz, CDCl<sub>3</sub>) δ 2.45 (s, 3H), 3.09 (s, 6H), 7.13 (s, 1H), 7.23 (td, *J* = 7.2, 2 Hz, 1H), 7.31 (m, 2H), 7.39-7.44 (m, 2H), 7.69 (d, *J* = 8Hz, 1H), 7.91 (d, *J* = 8Hz, 2H); <sup>13</sup>C NMR (100 MHz, CDCl<sub>3</sub>) δ 21.8, 37.5, 111.5, 115.3, 122.2, 123.3, 126.9, 127.1, 129.2, 129.9, 134.9, 135.7, 137.7, 143.7, 153.8, 186.2; HRMS

(EI) Calcd for  $C_{19}H_{18}N_2O_2$   $[M]^+$  306.1368, found 306.1375.

***N,N*-Dimethyl-2-(4-methoxybenzoyl)-1H-indole-1-carboxamide (3h)**

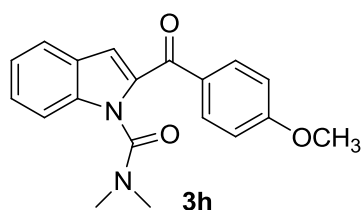

Yield: 85%.  $^1H$  NMR (400MHz,  $CDCl_3$ )  $\delta$  3.10 (brs, 6H), 3.90 (s, 3H), 7.01 (m, 2H), 7.11 (s, 1H), 7.23 (td,  $J = 7.2$ , 2 Hz, 1H), 7.38-7.44 (m, 2H), 7.70 (d,  $J = 8$ Hz, 1H), 8.02 (d,  $J = 8$ Hz, 2H);  $^{13}C$  NMR (100 MHz,  $CDCl_3$ )  $\delta$  37.7, 55.6, 111.5, 113.8, 114.8, 122.2, 123.3, 126.7, 130.2, 132.1, 135.8, 137.5, 153.9, 163.6, 185.2; HRMS (EI) Calcd for  $C_{19}H_{18}N_2O_3$   $[M]^+$  322.1317, found 322.1310.

***N,N*-Dimethyl-2-(4-nitrobenzoyl)-1H-indole-1-carboxamide (3i)**

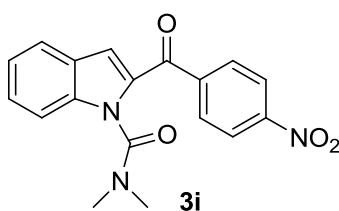

Yield: 50%.  $^1H$  NMR (400MHz,  $CDCl_3$ )  $\delta$  3.14 (brs, 6H), 7.14 (s, 1H), 7.27 (td,  $J = 7.2$ , 2 Hz, 1H), 7.39 (d,  $J = 8.4$  Hz, 1H), 7.48 (td,  $J = 7.2$ , 2 Hz, 1H), 7.72 (d,  $J = 8.0$  Hz, 1H), 8.14 (d,  $J = 8.4$ Hz, 2H), 8.37 (d,  $J = 8.4$ Hz, 2H);  $^{13}C$  NMR (100 MHz,  $CDCl_3$ )  $\delta$  37.3, 111.6, 116.8, 122.7, 123.7, 123.8, 126.8, 128.2, 130.6, 134.8, 138.3, 142.6, 150.2, 153.4, 184.5; HRMS (EI) Calcd for  $C_{18}H_{15}N_3O_4$   $[M]^+$  337.1063, found 337.1055.

***N,N*-Dimethyl-2-(4-trifluoromethylbenzoyl)-1H-indole-1-carboxamide (3j)**

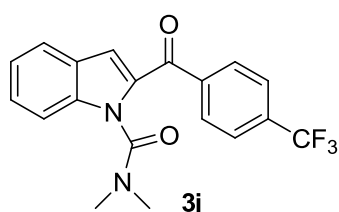

Yield: 82%.  $^1H$  NMR (400MHz,  $CDCl_3$ )  $\delta$  3.10 (brs, 6H), 7.14 (d,  $J = 0.8$  Hz, 1H), 7.25 (td,  $J = 7.2$ , 2 Hz, 1H), 7.40 (m, 1H), 7.46 (m, 1H), 7.71 (d,  $J = 8.0$  Hz, 1H), 7.79 (d,  $J = 8.0$  Hz, 2H), 8.09 (d,  $J = 8.0$  Hz, 2H);  $^{13}C$  NMR (100 MHz,  $CDCl_3$ )  $\delta$  38.1,

111.6, 116.5, 122.6, 123.6, 125.6, 126.8, 127.9, 130.1, 134.2, 135.1, 138.1, 140.6, 153.6, 185.3; HRMS (EI) Calcd for  $C_{19}H_{15}F_3N_2O_2$   $[M]^+$  360.1086, found 360.1090.

***N,N*-Dimethyl-2-(4-acetylbenzoyl)-1*H*-indole-1-carboxamide (3k)**

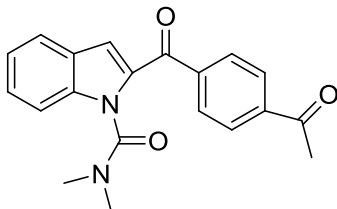

Yield: 60%.  $^1H$  NMR (400MHz,  $CDCl_3$ )  $\delta$  2.68 (s, 3H), 3.12 (brs, 6H), 7.14 (s, 1H), 7.25 (m, 1H), 7.38-7.48 (m, 2H), 7.71 (d,  $J = 8$  Hz, 1H), 8.04-8.11 (m, 4H);  $^{13}C$  NMR (100 MHz,  $CDCl_3$ )  $\delta$  27.07, 37.7, 111.6, 116.4, 122.5, 123.6, 126.8, 127.8, 129.9, 135.2, 138.1, 139.9, 141.2, 153.7, 185.7, 197.6; HRMS (EI) Calcd for  $C_{20}H_{18}N_2O_3$   $[M]^+$  334.1317, found 334.1308.

***N,N*-Dimethyl-2-(4-formylbenzoyl)-1*H*-indole-1-carboxamide (3l)**

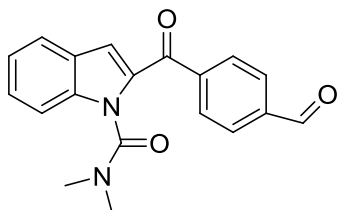

Yield: 68%.  $^1H$  NMR (400MHz,  $CDCl_3$ )  $\delta$  3.11 (brs, 6H), 7.15 (s, 1H), 7.25 (m, 1H), 7.38-7.49 (m, 2H), 7.72 (d,  $J = 8$  Hz, 1H), 8.03 (d,  $J = 8.4$  Hz, 2H), 8.13 (d,  $J = 8.4$  Hz, 2H), 10.1 (s, 1H);  $^{13}C$  NMR (100 MHz,  $CDCl_3$ )  $\delta$  37.7, 111.6, 116.5, 122.6, 123.6, 126.9, 127.9, 129.7, 130.2, 135.1, 138.2, 138.9, 142.3, 153.6, 185.6, 191.7; HRMS (EI) Calcd for  $C_{19}H_{16}N_2O_3$   $[M]^+$  320.1161, found 320.1170.

***N,N*-Dimethyl-2-(4-methoxycarbonylbenzoyl)-1*H*-indole-1-carboxamide (3m)**

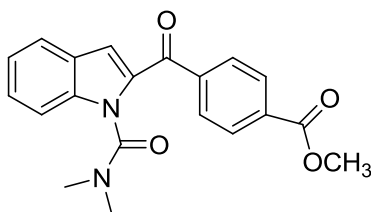

Yield: 78%.  $^1H$  NMR (400MHz,  $CDCl_3$ )  $\delta$  3.11 (brs, 6H), 3.96 (s, 3H), 7.14 (s, 1H), 7.23 (m, 1H), 7.38-7.47 (m, 2H), 7.71 (d,  $J = 8$  Hz, 1H), 8.02 (d,  $J = 8.4$  Hz, 2H), 8.17 (d,  $J = 8.4$  Hz, 2H);  $^{13}C$  NMR (100 MHz,  $CDCl_3$ )  $\delta$  38.0, 52.6, 111.6, 116.3, 122.5, 123.6, 126.8, 127.7, 129.5, 129.7, 133.6, 135.2, 138.1, 141.1, 153.6, 166.3, 185.7;

HRMS (EI) Calcd for  $C_{20}H_{18}N_2O_4$   $[M]^+$  350.1276, found 350.1266.

***N,N*-Dimethyl-2-(4-chlorobenzoyl)-1*H*-indole-1-carboxamide (3n)**

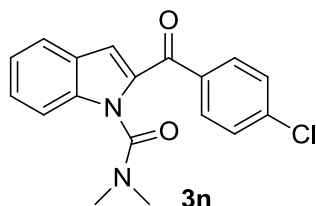

Yield: 50%.  $^1H$  NMR (400MHz,  $CDCl_3$ )  $\delta$  3.09 (brs, 6H), 7.12 (d,  $J = 0.4$  Hz, 1H), 7.24 (td,  $J = 7.2$ , 2 Hz, 1H), 7.38-7.44 (m, 2H), 7.48-7.51 (m, 2H), 7.72 (d,  $J = 8$ Hz, 1H), 7.97 (d,  $J = 8$ Hz, 2H);  $^{13}C$  NMR (100 MHz,  $CDCl_3$ )  $\delta$  37.5, 111.6, 115.7, 122.4, 123.5, 126.8, 127.5, 128.9, 131.2, 135.2, 135.9, 137.9, 139.3, 153.7, 185.2; HRMS (EI) Calcd for  $C_{18}H_{15}ClN_2O_2$   $[M]^+$  326.0822, found 326.0812.

***N,N*-Dimethyl-2-(4-bromobenzoyl)-1*H*-indole-1-carboxamide (3o)**

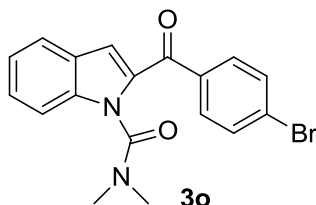

Yield: 60%.  $^1H$  NMR (400MHz,  $CDCl_3$ )  $\delta$  3.09 (brs, 6H), 7.12 (s, 1H), 7.24 (t,  $J = 7.2$ Hz, 1H), 7.38-7.46 (m, 2H), 7.66 (d,  $J = 8$ Hz, 2H), 7.70 (d,  $J = 8$ Hz, 1H), 7.87 (d,  $J = 8$ Hz, 2H);  $^{13}C$  NMR (100 MHz,  $CDCl_3$ )  $\delta$  37.7, 111.6, 115.8, 122.4, 123.5, 126.8, 127.5, 127.9, 131.2, 131.8, 135.1, 136.2, 137.9, 153.6, 185.3; HRMS (EI) Calcd for  $C_{18}H_{15}BrN_2O_2$   $[M]^+$  370.0317, found 370.0312.

***N,N*-Dimethyl-2-(3-methoxybenzoyl)-1*H*-indole-1-carboxamide (3p)**

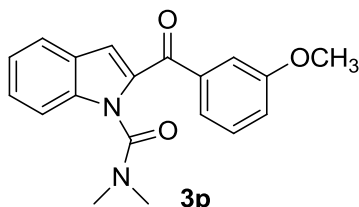

Yield: 76%.  $^1H$  NMR (400MHz,  $CDCl_3$ )  $\delta$  3.10 (brs, 6H), 3.87 (s, 3H), 7.15-7.17 (m, 2H), 7.23 (td,  $J = 7.2$ , 2 Hz, 1H), 7.39-7.43 (m, 3H), 7.50 (m, 1H), 7.60 (d,  $J = 6.4$ Hz, 1H), 7.70 (d,  $J = 8$ Hz, 1H);  $^{13}C$  NMR (100 MHz,  $CDCl_3$ )  $\delta$  37.6, 55.6, 111.6, 113.8, 115.8, 119.5, 122.3, 122.5, 123.4, 126.9, 127.3, 129.5, 135.5, 137.8, 138.8, 153.6,

159.7, 186.3; HRMS (EI) Calcd for  $C_{19}H_{18}N_2O_3$   $[M]^+$  322.1317, found 322.1308.

***N,N*-Dimethyl-2-(3-trifluoromethylbenzoyl)-1H-indole-1-carboxamide (3q)**

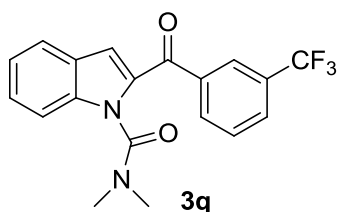

Yield: 74%.  $^1H$  NMR (400MHz,  $CDCl_3$ )  $\delta$  3.09 (brs, 6H), 7.14 (s, 1H), 7.25 (td,  $J = 7.2, 2$  Hz, 1H), 7.40 (d,  $J = 8.4$  Hz, 1H), 7.47 (m, 1H), 7.67 (t,  $J = 8.0$  Hz, 1H), 7.73 (d,  $J = 8.0$  Hz, 1H), 7.88 (d,  $J = 7.6$  Hz, 1H), 8.18 (d,  $J = 8.0$  Hz, 1H), 8.26 (s, 1H);  $^{13}C$  NMR (100 MHz,  $CDCl_3$ )  $\delta$  38.6, 111.6, 116.2, 122.6, 123.7, 126.5, 126.8, 127.8, 129.2, 129.3, 131.0, 131.4, 132.9, 134.9, 138.0, 138.1, 153.6, 185.0; HRMS (EI) Calcd for  $C_{19}H_{15}F_3N_2O_2$   $[M]^+$  360.1086, found 360.1092.

***N,N*-Dimethyl-2-(2-methoxybenzoyl)-1H-indole-1-carboxamide (3r)**

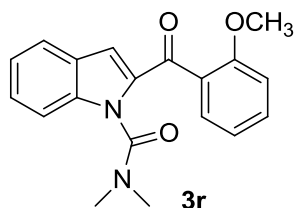

Yield: 80%.  $^1H$  NMR (400MHz,  $CDCl_3$ )  $\delta$  2.85 (brs, 3H), 3.26 (brs, 3H), 3.79 (s, 3H), 6.94 (s, 1H), 7.02 (m, 2H), 7.20 (td,  $J = 7.2, 2$  Hz, 1H), 7.38-7.52 (m, 4H), 7.63 (d,  $J = 8.0$  Hz, 1H);  $^{13}C$  NMR (100 MHz,  $CDCl_3$ )  $\delta$  37.2, 38.1, 55.8, 111.6, 111.7, 115.8, 120.2, 122.1, 123.3, 126.8, 127.3, 128.1, 130.2, 132.4, 136.5, 138.1, 153.7, 157.7, 186.3; HRMS (EI) Calcd for  $C_{19}H_{18}N_2O_3$   $[M]^+$  322.1317, found 322.1307.

***N,N*-Dimethyl-2-(2-trifluoromethylbenzoyl)-1H-indole-1-carboxamide (3s)**

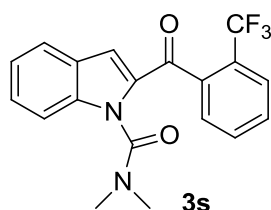

Yield: 50%.  $^1H$  NMR (400MHz,  $CDCl_3$ )  $\delta$  2.86 (s, 3H), 3.32 (s, 3H), 6.83 (s, 1H), 7.21 (td,  $J = 7.2, 2$  Hz, 1H), 7.39-7.47 (m, 2H), 7.62-7.67 (m, 4H), 7.80 (m, 1H);  $^{13}C$  NMR (100 MHz,  $CDCl_3$ )  $\delta$  37.1, 38.0, 111.6, 117.3, 122.4, 123.6, 126.7, 126.9, 128.1,

129.3, 130.4, 131.4, 135.2, 137.4, 138.5, 153.5, 185.8; HRMS (EI) Calcd for  $C_{19}H_{15}F_3N_2O_2$   $[M]^+$  360.1086, found 360.1094.

***N,N*-Dimethyl-2-(Benzo-[1,3]-dioxole-5-carbonyl)-1H-indole-1-carboxamide (3t)**

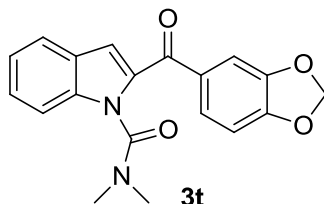

Yield: 85%.  $^1H$  NMR (400MHz,  $CDCl_3$ )  $\delta$  3.10 (brs, 6H), 6.08 (s, 2H), 6.91 (d,  $J = 8.4$  Hz, 1H), 7.12 (s, 1H), 7.23 (t,  $J = 6.4$  Hz, 1H), 7.37-7.42 (m, 2H), 7.48 (d,  $J = 1.6$  Hz, 1H), 7.66 (dd,  $J = 8.0, 1.2$  Hz, 1H), 7.70 (d,  $J = 8.0$  Hz, 1H);  $^{13}C$  NMR (100 MHz,  $CDCl_3$ )  $\delta$  37.8, 102.0, 108.0, 109.5, 111.5, 114.9, 122.2, 123.3, 126.4, 126.8, 127.0, 131.8, 135.7, 137.6, 148.1, 151.9, 153.8, 184.7; HRMS (EI) Calcd for  $C_{19}H_{16}N_2O_4$   $[M]^+$  336.1110, found 360.1118.

***N,N*-Dimethyl-2-(1-Naphthoyl)-1H-indole-1-carboxamide (3u)**

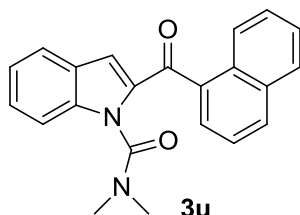

Yield: 90%.  $^1H$  NMR (400MHz,  $CDCl_3$ )  $\delta$  2.98 (brs, 3H), 3.29 (brs, 3H), 6.97 (s, 1H), 7.21 (m, 1H), 7.42-7.46 (m, 2H), 7.52-7.56 (m, 3H), 7.63 (d,  $J = 8.0$ Hz, 1H), 7.90-7.93 (m, 2H), 8.02 (d,  $J = 8.4$ Hz, 1H), 8.34 (m, 1H);  $^{13}C$  NMR (100 MHz,  $CDCl_3$ )  $\delta$  37.2, 38.0, 111.7, 116.7, 122.3, 123.5, 124.3, 125.6, 126.6, 126.8, 127.6, 128.4, 128.7, 131.0, 132.1, 133.8, 135.4, 137.1, 138.3, 153.8, 188.0; HRMS (EI) Calcd for  $C_{22}H_{18}N_2O_2$   $[M]^+$  342.1368, found 342.1359.

***N,N*-Dimethyl-2-(furan-2-carbonyl)-1H-indole-1-carboxamide (3v)**

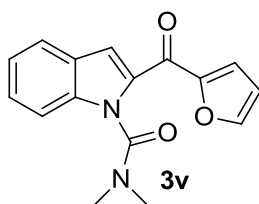

Yield: 85%.  $^1H$  NMR (400MHz,  $CDCl_3$ )  $\delta$  2.91 (brs, 3H), 3.27 (brs, 3H), 6.61 (dd,  $J =$

3.2, 2.0Hz, 1H), 7.23 (td,  $J = 7.2, 2$  Hz, 1H), 7.36-7.44 (m, 3H), 7.70 (m, 2H), 7.75 (d,  $J = 8.0$ Hz, 1H);  $^{13}\text{C}$  NMR (100 MHz,  $\text{CDCl}_3$ )  $\delta$  37.2, 38.1, 111.4, 112.5, 114.5, 119.4, 122.2, 123.5, 127.2, 127.3, 134.3, 137.6, 146.8, 152.4, 153.9, 172.3; HRMS (EI) Calcd for  $\text{C}_{16}\text{H}_{14}\text{N}_2\text{O}_3$   $[\text{M}]^+$  282.1004, found 282.1013.

***N,N*-Dimethyl-2-(thiophene-2-carbonyl)-1H-indole-1-carboxamide (3w)**

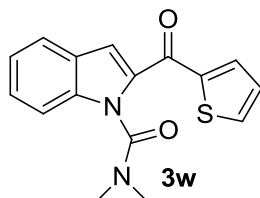

Yield: 73%.  $^1\text{H}$  NMR (400MHz,  $\text{CDCl}_3$ )  $\delta$  3.10 (brs, 6H), 7.19-7.27 (m, 2H), 7.37-7.45 (m, 3H), 7.73 (m, 2H), 7.98 (dd,  $J = 4.0, 1.2$ Hz, 1H);  $^{13}\text{C}$  NMR (100 MHz,  $\text{CDCl}_3$ )  $\delta$  37.9, 111.5, 114.1, 122.3, 123.4, 127.0, 127.2, 128.2, 133.9, 134.0, 135.4, 137.6, 142.9, 153.7, 177.8; HRMS (EI) Calcd for  $\text{C}_{16}\text{H}_{14}\text{N}_2\text{O}_2\text{S}$   $[\text{M}]^+$  298.0776, found 298.0769.

***N,N*-Dimethyl-2-butyryl-1H-indole-1-carboxamide (3x)**

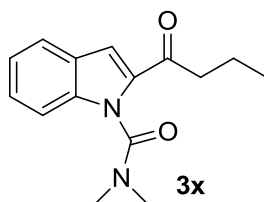

Yield: 70%.  $^1\text{H}$  NMR (400MHz,  $\text{CDCl}_3$ )  $\delta$  1.01 (t,  $J = 7.6$ Hz, 3H), 1.80 (m, 2H), 2.75 (s, 3H), 2.93 (t,  $J = 7.2$ Hz, 2H), 3.27 (s, 3H), 7.23 (td,  $J = 7.2, 2$  Hz, 1H), 7.31 (m, 2H), 7.41 (m, 1H), 7.70 (d,  $J = 8.4$ Hz, 1H);  $^{13}\text{C}$  NMR (100 MHz,  $\text{CDCl}_3$ )  $\delta$  14.0, 18.2, 36.9, 38.0, 40.8, 111.3, 112.2, 122.1, 123.3, 126.8, 127.2, 135.6, 137.6, 154.0, 192.7; HRMS (EI) Calcd for  $\text{C}_{15}\text{H}_{18}\text{N}_2\text{O}_2$   $[\text{M}]^+$  258.1368, found 258.1360.

***N,N*-Dimethyl-2-cyclohexanecarbonyl-1H-indole-1-carboxamide (3y)**

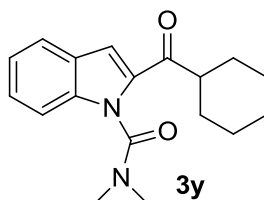

Yield: 60%.  $^1\text{H}$  NMR (400MHz,  $\text{CDCl}_3$ )  $\delta$  1.21-1.43 (m, 3H), 1.54-1.60 (m, 2H), 1.72-1.94 (m, 5H), 2.72 (s, 3H), 3.15 (tt,  $J = 15.2, 3.6$  Hz, 1H), 3.26 (s, 3H), 7.20 (t,  $J = 7.6$ Hz, 1H), 7.31 (m, 2H), 7.40 (m, 1H), 7.70 (d,  $J = 8.4$ Hz, 1H);  $^{13}\text{C}$  NMR (100



MHz, CDCl<sub>3</sub>)  $\delta$  25.9, 29.7, 29.9, 36.9, 37.9, 47.0, 111.3, 111.8, 122.1, 123.2, 126.8, 127.1, 134.9, 137.7, 154.0, 196.2; HRMS (EI) Calcd for C<sub>18</sub>H<sub>22</sub>N<sub>2</sub>O<sub>2</sub> [M]<sup>+</sup> 298.1681, found 298.1674.

***N,N'*-Bis(*N,N*-dimethylcarbamoyl)-2,2'-biindolyl (3z)**

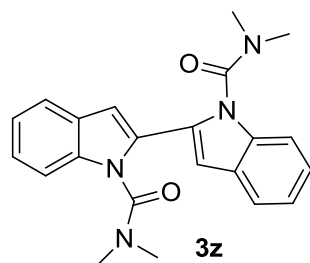

Yield: 54%. <sup>1</sup>H NMR (400MHz, CDCl<sub>3</sub>)  $\delta$  2.93 (brs, 6H), 3.19 (brs, 6H), 6.71 (s, 2H), 7.22 (t, *J* = 7.2Hz, 2H), 7.30 (t, *J* = 7.2Hz, 2H), 7.40 (d, *J* = 8.0Hz, 2H), 7.64 (d, *J* = 7.6, 2H); <sup>13</sup>C NMR (100 MHz, CDCl<sub>3</sub>)  $\delta$  37.2, 38.4, 105.64, 111.38, 121.3, 121.9, 124.0, 128.4, 130.0, 136.5, 153.9; HRMS (EI) Calcd for C<sub>22</sub>H<sub>22</sub>N<sub>4</sub>O<sub>2</sub> [M]<sup>+</sup> 374.1743, found 374.1736.

**6-nitro-*N,N*-Dimethyl-2-benzoyl-1H-indole-1-carboxamide (4g)**

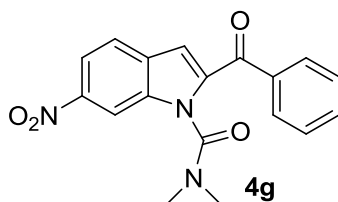

Yield: 45%. <sup>1</sup>H NMR (400MHz, CDCl<sub>3</sub>)  $\delta$  3.13 (brs, 6H), 7.20 (d, *J* = 0.8Hz, 1H), 7.55 (t, *J* = 8.0Hz, 2H), 7.66 (m, 1H), 7.82 (d, *J* = 8.4 Hz, 1H), 8.01 (m, 2H), 8.12 (dd, *J* = 8.8, 2Hz, 1H), 8.35 (d, *J* = 1.6Hz, 1H); <sup>13</sup>C NMR (100 MHz, CDCl<sub>3</sub>)  $\delta$  38.0, 108.4, 113.9, 117.3, 123.8, 128.8, 129.9, 131.3, 133.7, 136.1, 136.7, 139.7, 146.6, 152.5, 186.3; HRMS (EI) Calcd for C<sub>18</sub>H<sub>15</sub>N<sub>3</sub>O<sub>4</sub> [M]<sup>+</sup> 337.1063, found 337.1068.

**6-trifluoromethyl-*N,N*-Dimethyl-2-benzoyl-1H-indole-1-carboxamide (4h)**

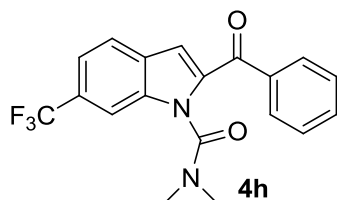

Yield: 70%. <sup>1</sup>H NMR (400MHz, CDCl<sub>3</sub>)  $\delta$  3.09 (brs, 6H), 7.18 (s, 1H), 7.46-7.56 (m, 3H), 7.62 (m, 1H), 7.70 (s, 1H), 7.81 (d, *J* = 11.2 Hz, 1H), 8.00 (m, 2H); <sup>13</sup>C NMR (100 MHz, CDCl<sub>3</sub>)  $\delta$  37.6, 109.3, 109.4, 114.5, 118.8, 118.9, 123.1, 124.0, 125.8,

128.7, 129.1, 129.8, 133.3, 136.5, 137.0, 137.5, 153.0, 186.4; HRMS (EI) Calcd for  $C_{19}H_{15}F_3N_2O_2$   $[M]^+$  360.1086, found 360.1076.

**6-methoxy-*N,N*-Dimethyl-2-benzoyl-1H-indole-1-carboxamide (4i)**

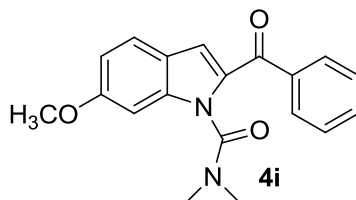

Yield: 87%.  $^1H$  NMR (400MHz,  $CDCl_3$ )  $\delta$  2.87 (brs, 3H), 3.27 (brs, 3H), 3.88 (s, 3H), 6.82 (d,  $J$  = 2Hz, 1H), 6.88 (dd,  $J$  = 8.8, 2.4Hz, 1H), 7.09 (s, 1H), 7.48-7.61 (m, 4H), 7.95 (d,  $J$  = 6.8 Hz, 2H);  $^{13}C$  NMR (100 MHz,  $CDCl_3$ )  $\delta$  37.7, 55.8, 93.5, 113.7, 116.5, 121.0, 124.3, 128.5, 129.5, 132.5, 134.6, 137.9, 139.4, 153.9, 160.5, 185.8; HRMS (EI) Calcd for  $C_{19}H_{18}N_2O_3$   $[M]^+$  322.1317, found 322.1317.

**6-bromo-*N,N*-Dimethyl-2-benzoyl-1H-indole-1-carboxamide (4j)**

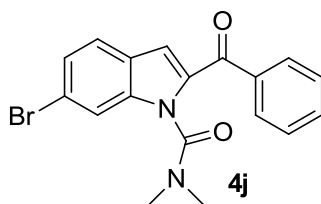

Yield: 70%.  $^1H$  NMR (400MHz,  $CDCl_3$ )  $\delta$  3.10 (brs, 6H), 7.10 (d,  $J$  = 0.8Hz, 1H), 7.35 (dd,  $J$  = 8.6, 1.6 Hz, 1H), 7.50-7.65 (m, 5H), 7.98 (m, 2H);  $^{13}C$  NMR (100 MHz,  $CDCl_3$ )  $\delta$  37.6, 114.6, 115.3, 121.2, 124.6, 125.6, 125.9, 128.6, 129.7, 133.1 135.9, 137.3, 138.3, 153.2, 186.3; HRMS (EI) Calcd for  $C_{18}H_{15}BrN_2O_2$   $[M]^+$  370.0317, found 370.0311.

**5-fluoro-*N,N*-Dimethyl-2-benzoyl-1H-indole-1-carboxamide (4k)**

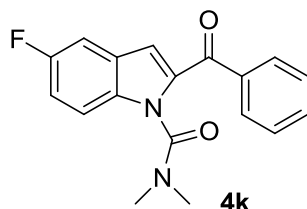

Yield: 55%.  $^1H$  NMR (400MHz,  $CDCl_3$ )  $\delta$  3.09 (brs, 6H), 6.89 (dd,  $J$  = 10, 8.0Hz, 1H), 7.20 (m, 2H), 7.36 (m, 1H), 7.53 (m, 2H), 7.65 (m, 1H), 7.99 (m, 2H);  $^{13}C$  NMR (100 MHz,  $CDCl_3$ )  $\delta$  37.7, 106.7, 106.9, 107.6, 107.7, 111.1, 116.5, 116.7, 128.0, 128.1, 128.6, 129.7, 133.1, 135.4, 137.1, 139.5, 139.6, 153.3, 156.2, 158.7, 186.3;

HRMS (EI) Calcd for  $C_{18}H_{15}FN_2O_2$   $[M]^+$  310.1118, found 310.1110.

**4-fluoro-*N,N*-Dimethyl-2-benzoyl-1H-indole-1-carboxamide (4l)**

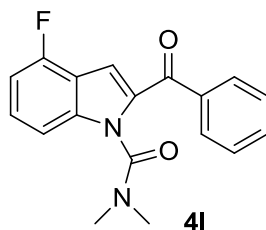

Yield: 78%.  $^1H$  NMR (400MHz,  $CDCl_3$ )  $\delta$  3.09 (brs, 6H), 7.09 (s, 1H), 7.19 (td,  $J$  = 8.8, 2.4 Hz, 1H), 7.32-7.38 (m, 2H), 7.52 (m, 2H), 7.65 (tt,  $J$  = 7.6, 1.6Hz, 1H), 7.99 (m, 2H);  $^{13}C$  NMR (100 MHz,  $CDCl_3$ )  $\delta$  37.7, 107.7, 107.9, 112.7, 112.8, 115.0, 115.1, 116.1, 116.3, 127.1, 127.2, 128.6, 129.7, 133.0, 134.4, 136.7, 137.3, 153.5, 157.9, 159.8, 186.4; HRMS (EI) Calcd for  $C_{18}H_{15}FN_2O_2$   $[M]^+$  310.1118, found 310.1110.

***N,N*-Dimethyl-3-methyl-2-benzoyl-1H-indole-1-carboxamide (4m)**

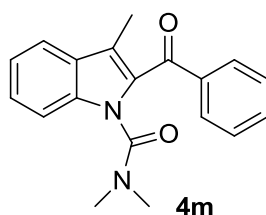

Yield: 47%  $^1H$  NMR (400MHz,  $CDCl_3$ )  $\delta$  2.22 (s, 3H), 3.02 (s, 6H), 7.25 (m, 1H), 7.36 (m, 1H), 7.41-7.52 (m, 3H), 7.57 (t,  $J$  = 7.2 Hz, 1H), 7.66 (d,  $J$  = 8.0Hz, 1H), 7.86 (m, 2H);  $^{13}C$  NMR (100 MHz,  $CDCl_3$ )  $\delta$  11.0, 37.8, 111.8, 121.2, 121.8, 122.4, 126.9, 128.6, 128.9, 129.5, 133.0, 133.9, 136.6, 138.7, 154.1, 189.1; HRMS (EI) Calcd for  $C_{19}H_{18}N_2O_2$   $[M]^+$  306.1368, found 306.1360.

***N,N*-Dimethyl-2-benzoyl-1H-pyrrolo[2,3-*b*]pyridine-1-carboxamide (4n)**

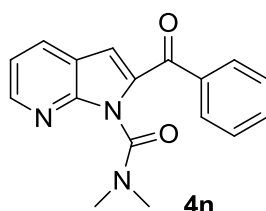

Yield: 45%.  $^1H$  NMR (400MHz,  $CDCl_3$ )  $\delta$  3.05 (s, 3H), 3.33 (s, 3H), 7.08 (s, 1H), 7.21 (dd,  $J$  = 5.2, 4.8Hz, 1H), 7.52 (m, 2H), 7.64 (m, 1H), 8.01 (m, 3H), 8.56 (dd,  $J$  = 4.4, 1.6Hz, 1H);  $^{13}C$  NMR (100 MHz,  $CDCl_3$ )  $\delta$  37.2, 38.5, 113.3, 118.4, 119.4, 128.6, 129.9, 131.8, 133.1, 135.8, 137.2, 148.4, 149.0, 152.7, 186.7; HRMS (EI) Calcd for

$C_{17}H_{15}N_3O_2$   $[M]^+$  293.1164, found 293.1158.

**Indol-2-yl phenyl ketone (3a-1)**

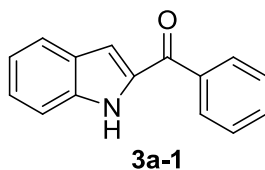

Yield: 98%.  $^1H$  NMR (400MHz,  $CDCl_3$ )  $\delta$  7.22 (m, 2H), 7.41 (m, 1H), 7.55 (m, 3H), 7.66 (tt,  $J = 7.2, 1.4$  Hz, 1 H), 7.76 (td,  $J = 8.2, 1.1$ Hz, 1H), 8.05 (m, 2H), 9.80 (s, 1H);  $^{13}C$  NMR (100 MHz,  $CDCl_3$ )  $\delta$  112.4, 113.1, 121.1, 123.3, 126.6, 127.7, 128.5, 129.3, 132.5, 134.4, 137.8, 138.1, 187.5; HRMS (EI) Calcd for  $C_{15}H_{11}NO$   $[M]^+$  221.0841, found 221.0833.

### $^1\text{H}$ and $^{13}\text{C}$ NMR Spectra of Compounds:

#### *N,N*-Dimethyl-2-Benzoyl-1H-indole-1-carboxamide (3a)

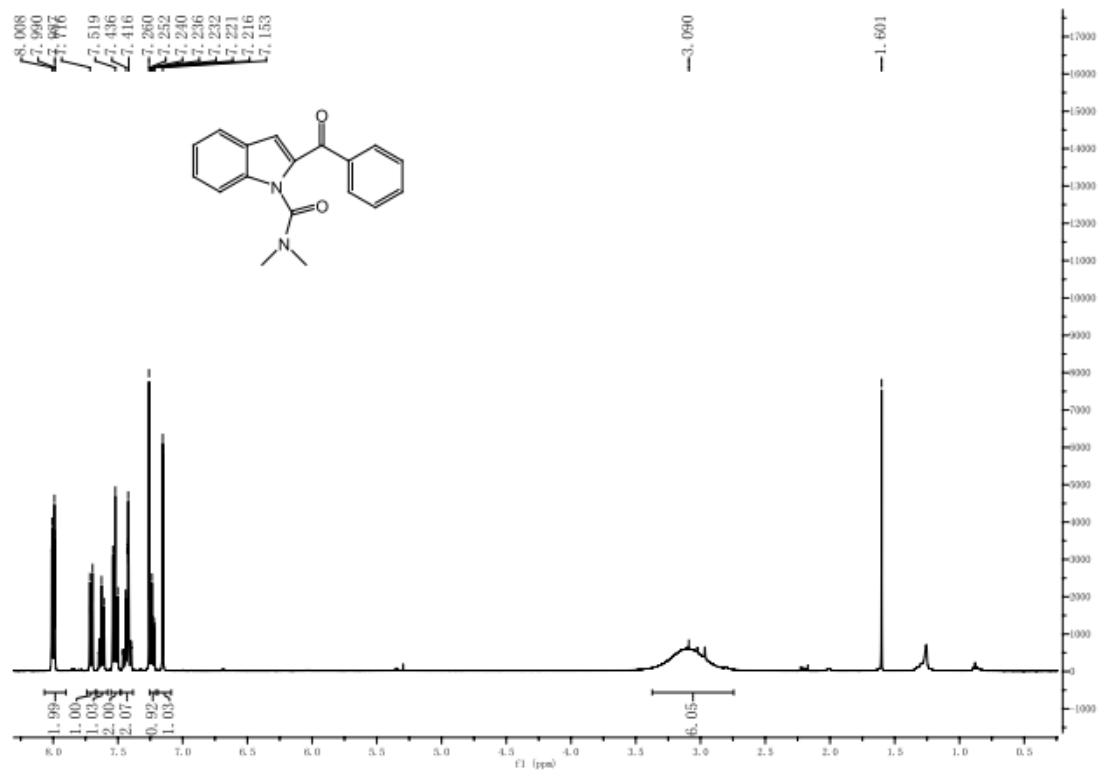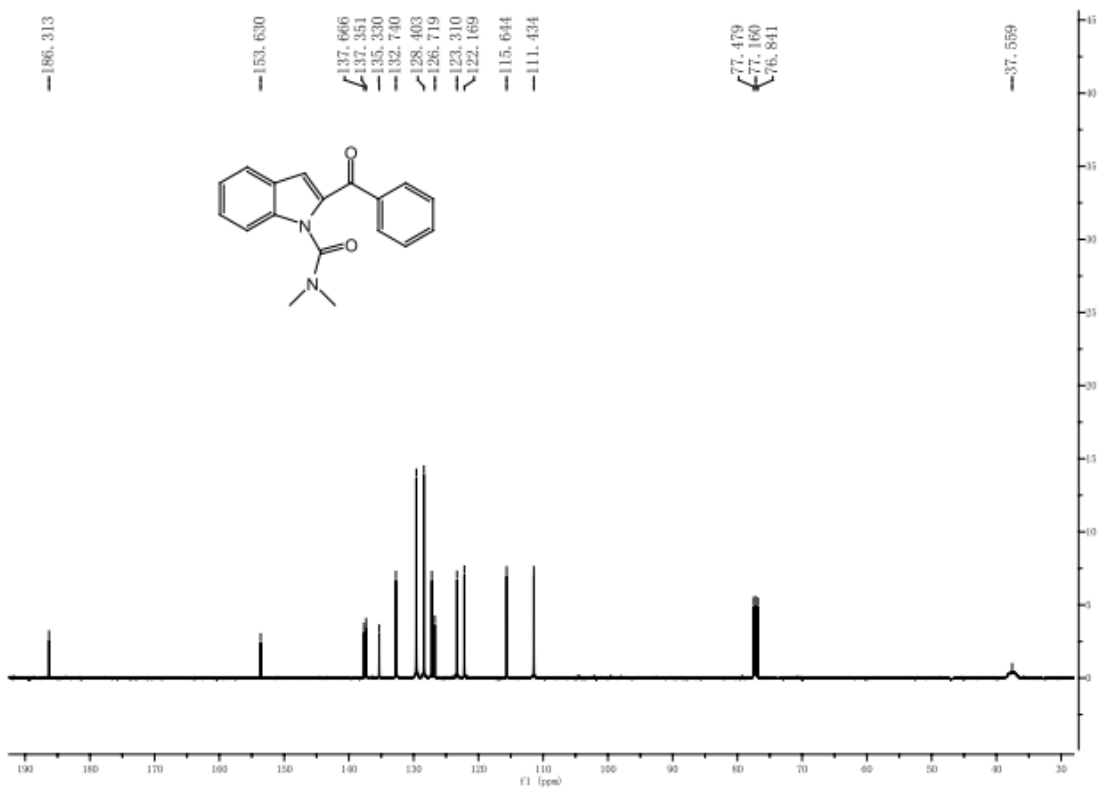

### *N,N*-Dimethyl-2-(4-methylbenzoyl)-1H-indole-1-carboxamide (3g)

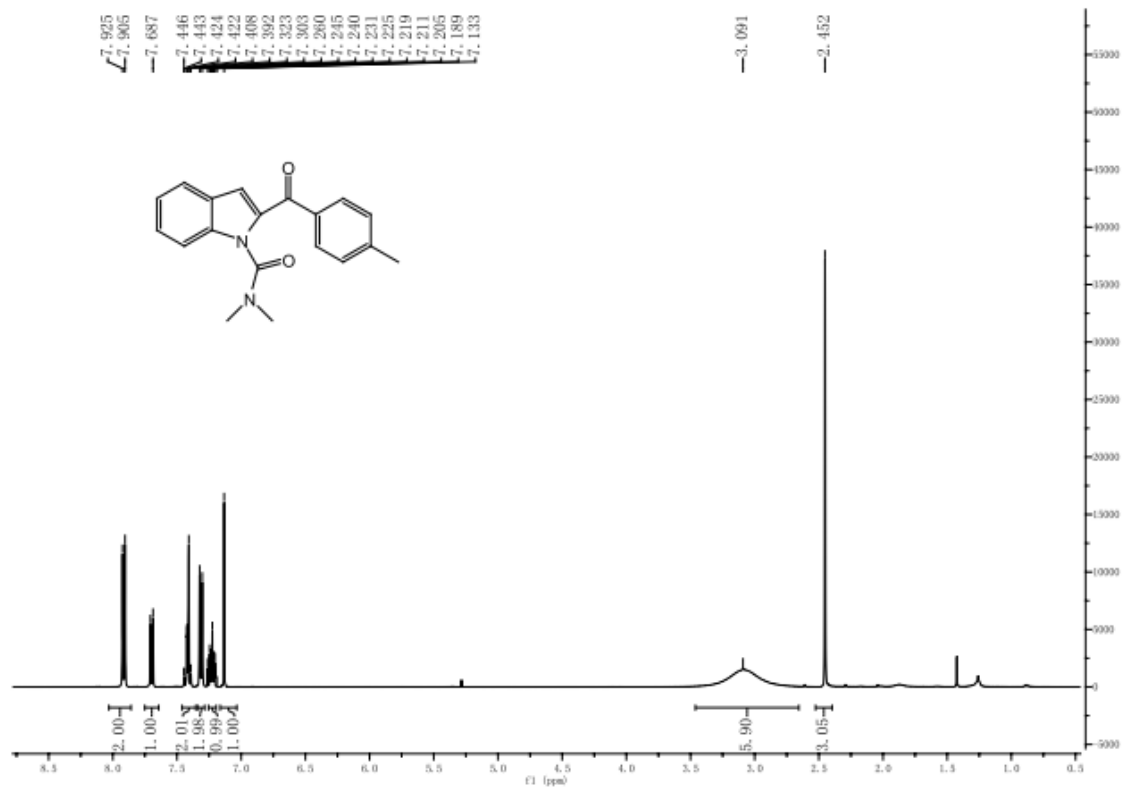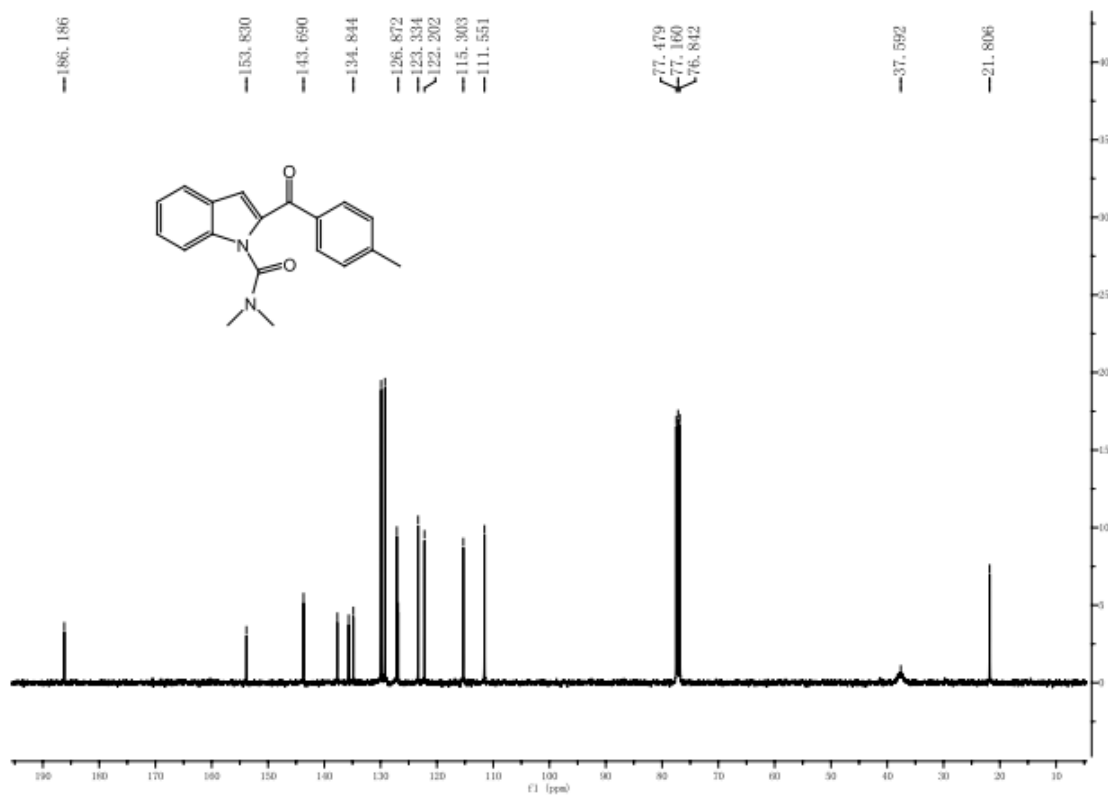

### *N,N*-Dimethyl-2-(4-methoxybenzoyl)-1*H*-indole-1-carboxamide (3h)

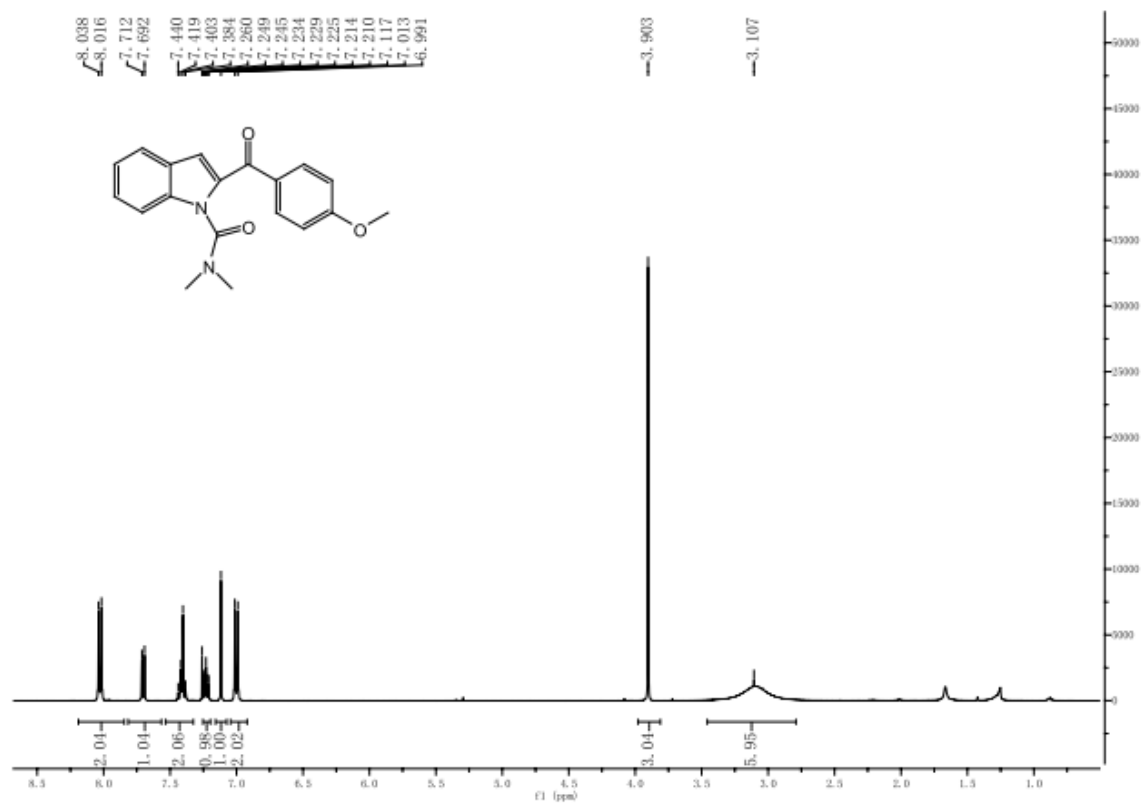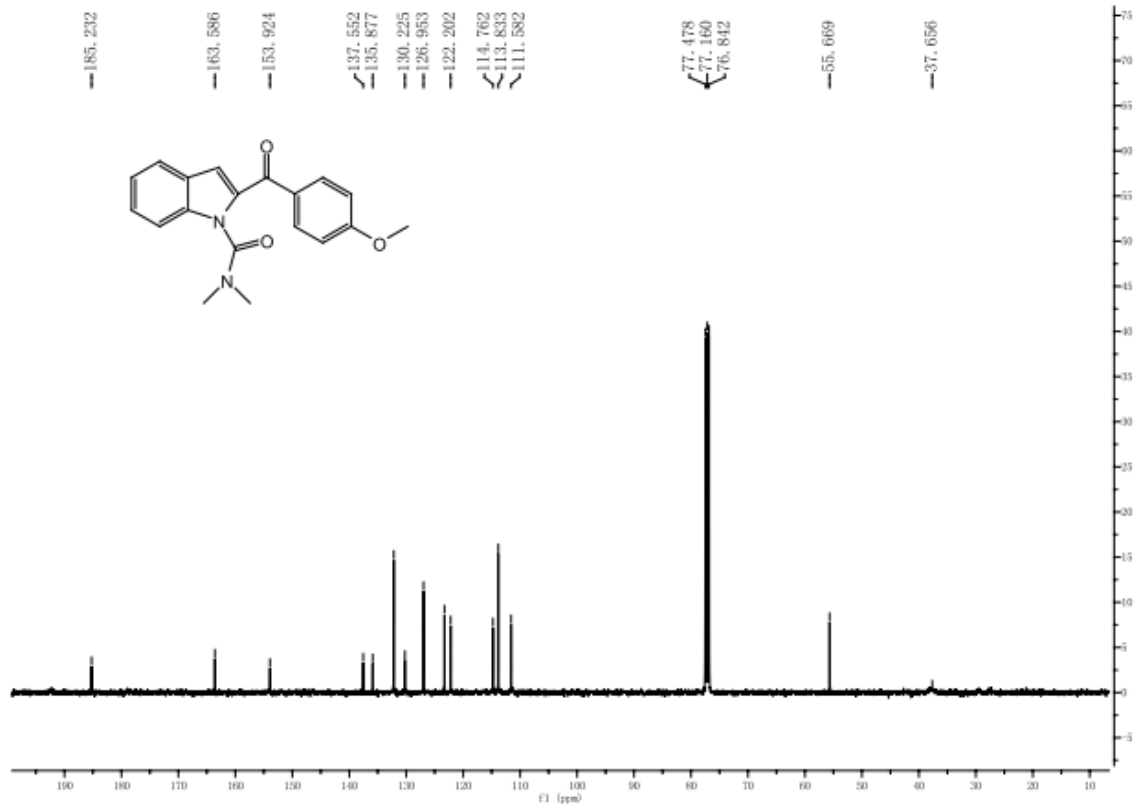

### *N,N*-Dimethyl-2-(4-nitrobenzoyl)-1*H*-indole-1-carboxamide (3i)

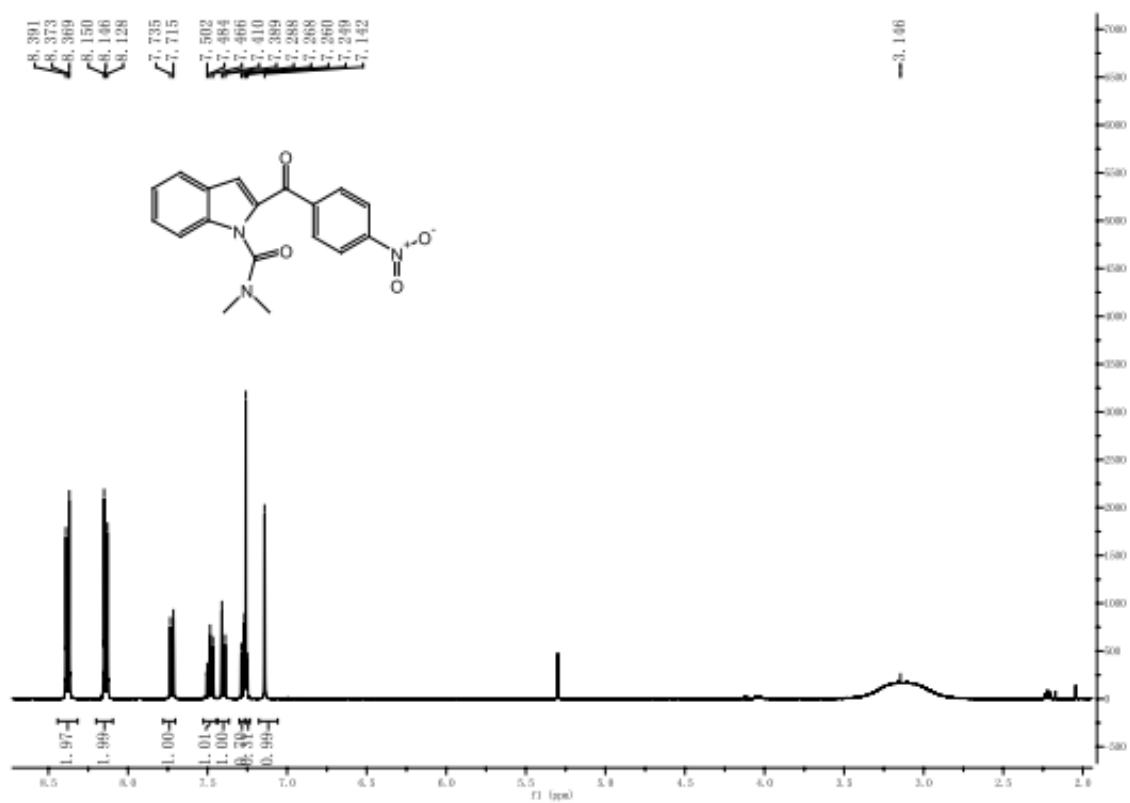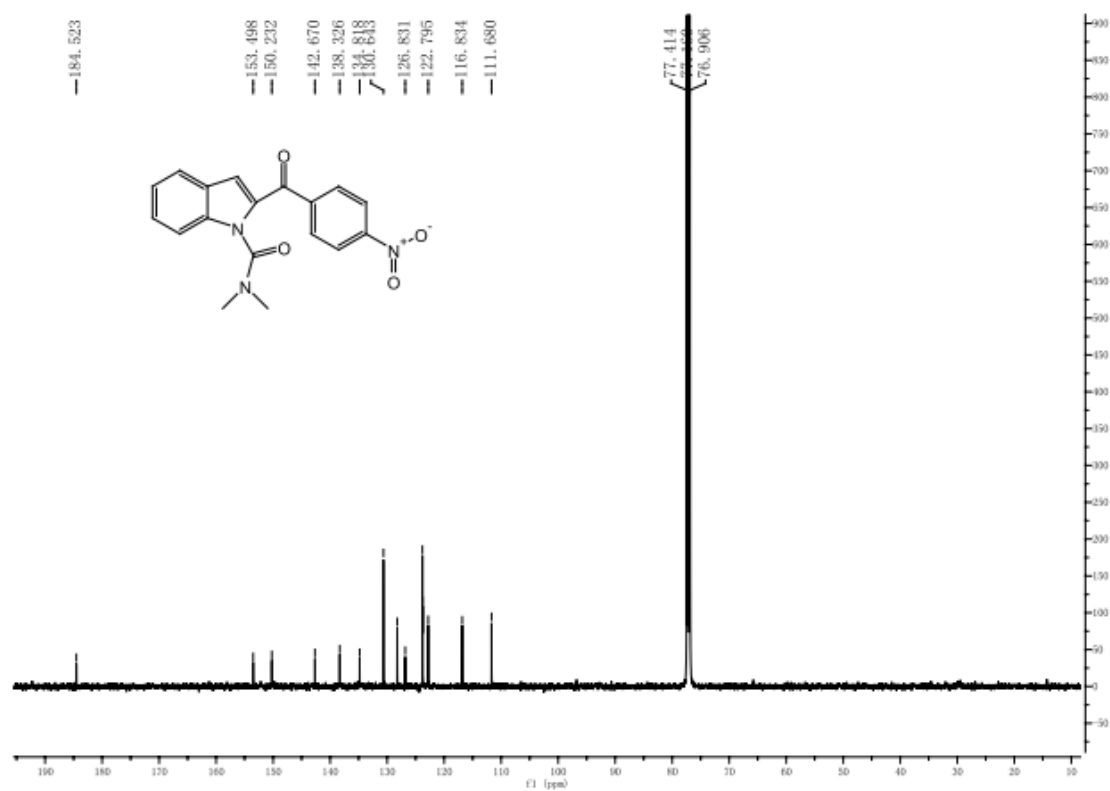



### *N,N*-Dimethyl-2-(4-trifluoromethylbenzoyl)-1*H*-indole-1-carboxamide (3j)

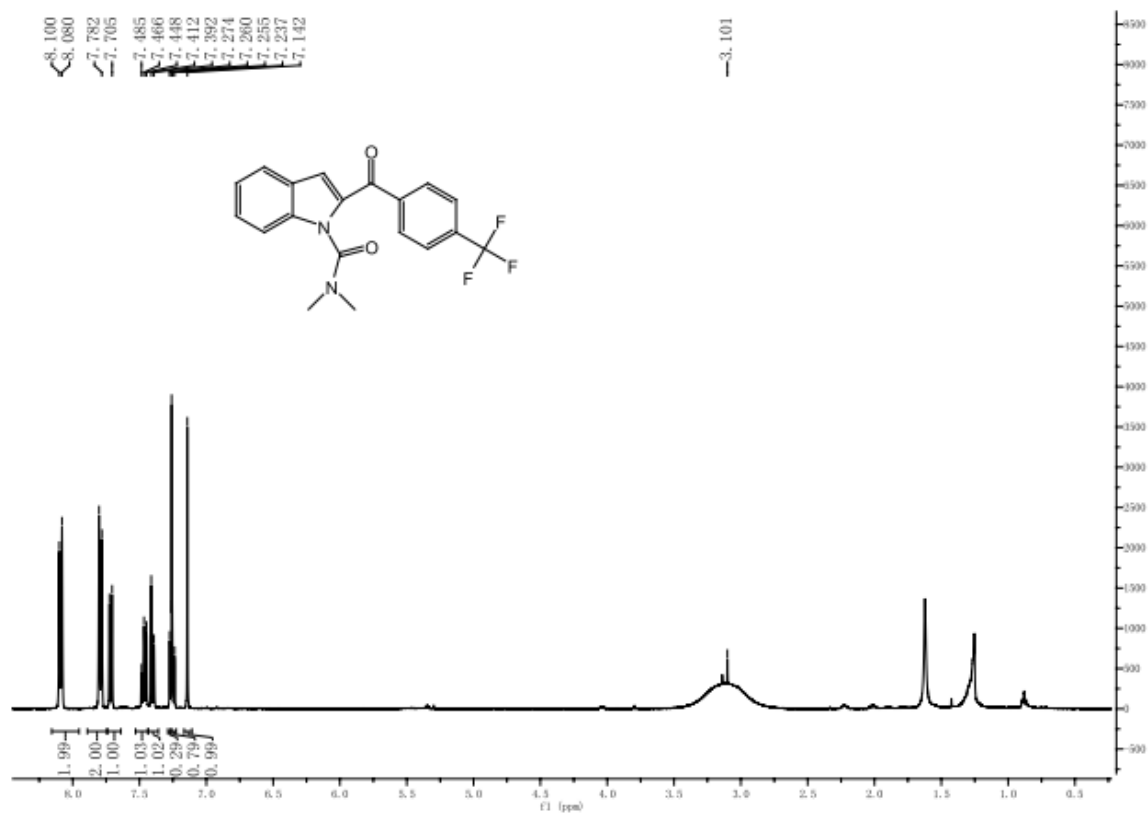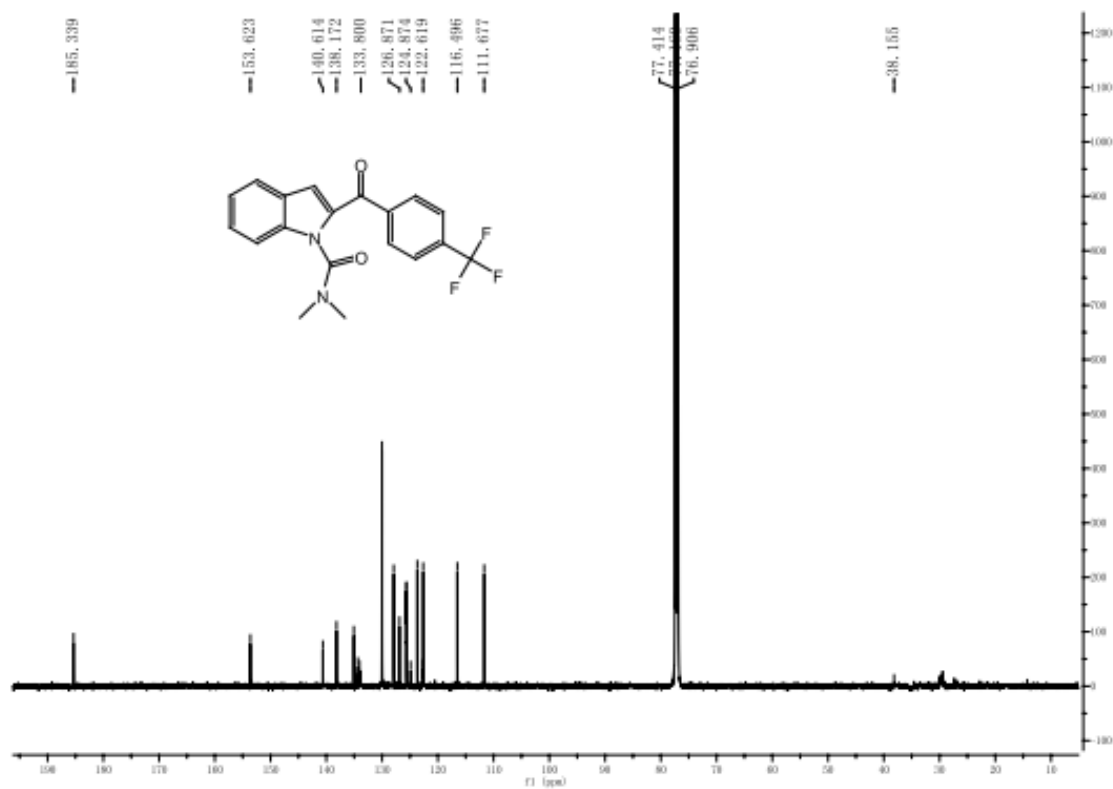

### *N,N*-Dimethyl-2-(4-acetylbenzoyl)-1*H*-indole-1-carboxamide (3k)

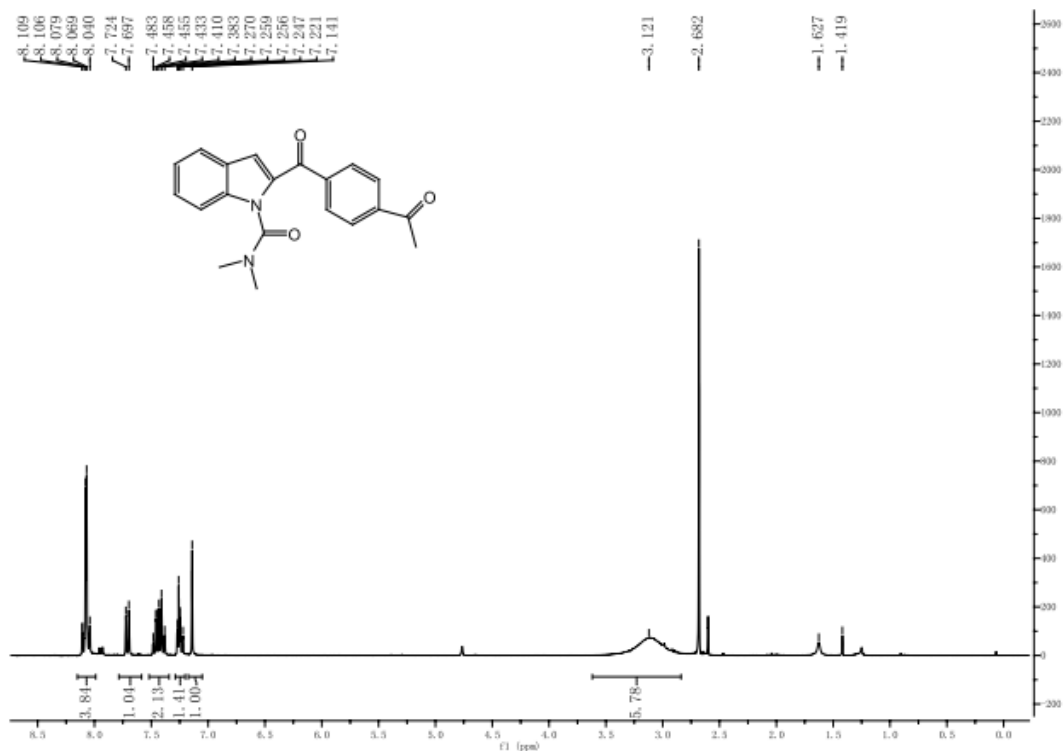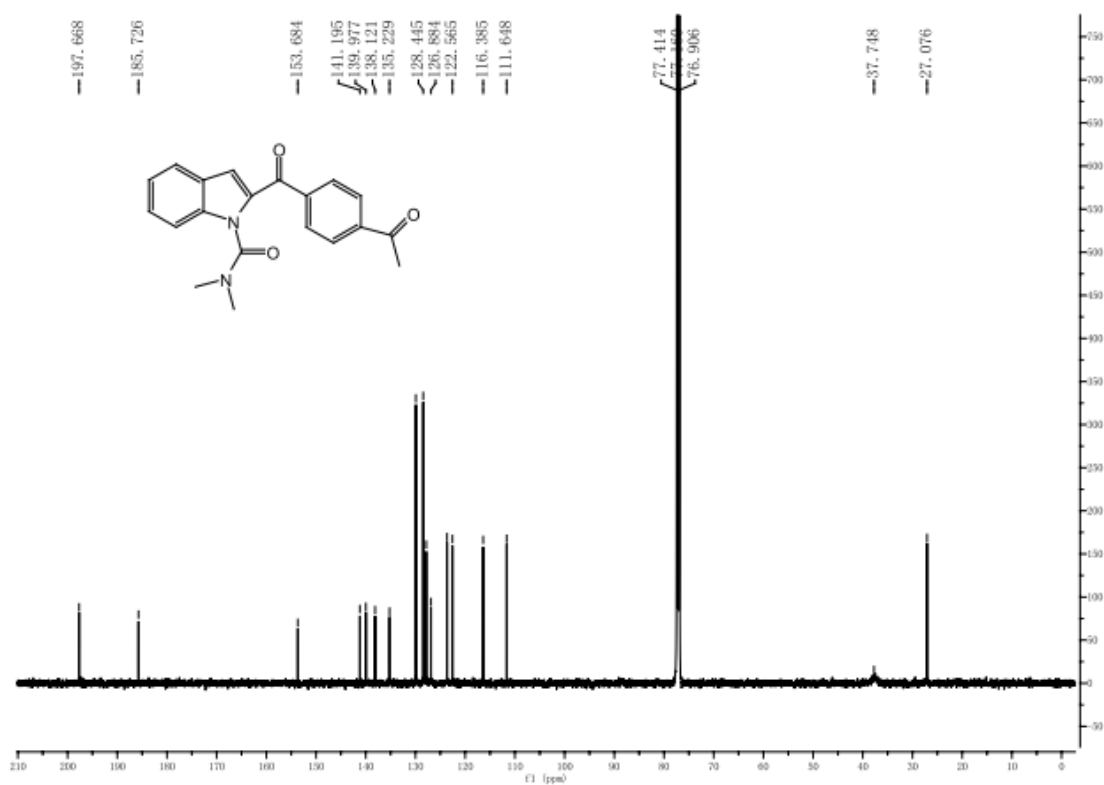

### *N,N*-Dimethyl-2-(4-formylbenzoyl)-1H-indole-1-carboxamide (31)

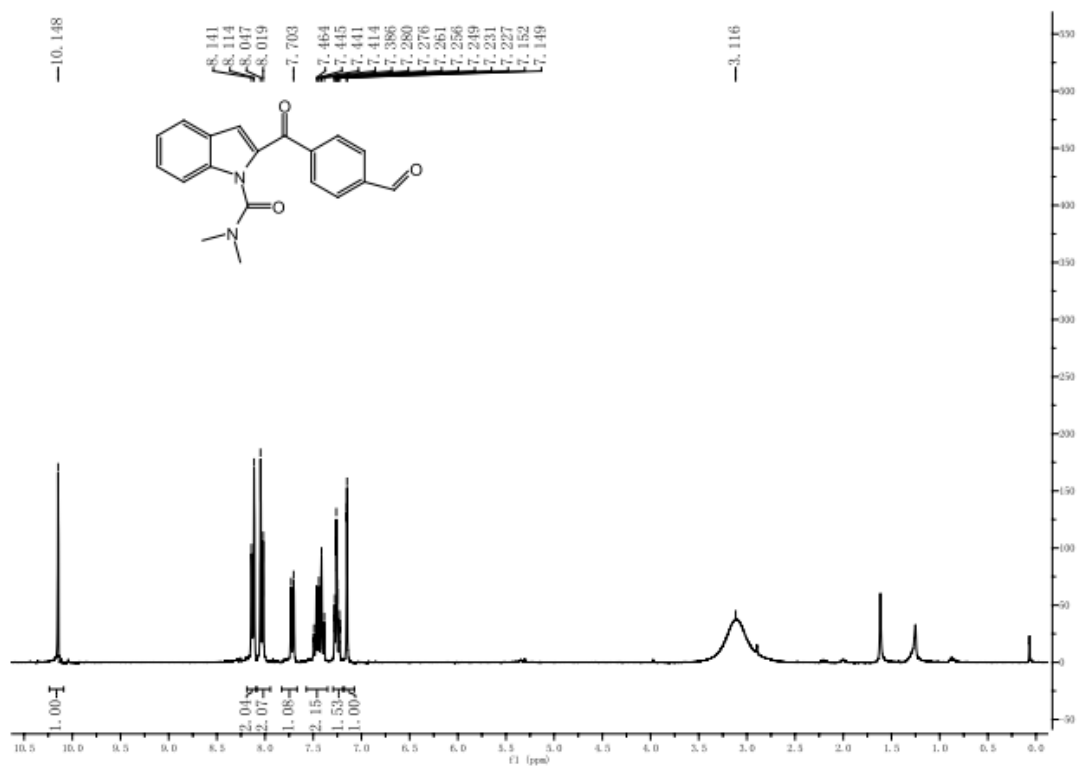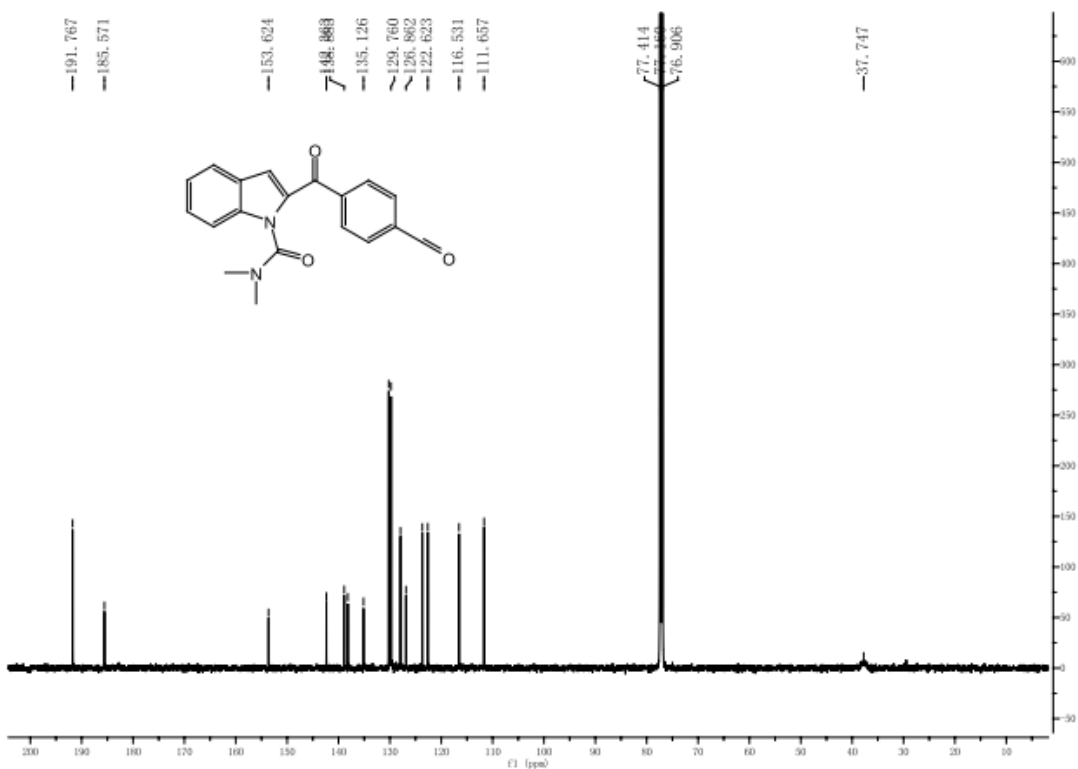

### *N,N*-Dimethyl-2-(4-methoxycarbonylbenzoyl)-1H-indole-1-carboxamide (3m)

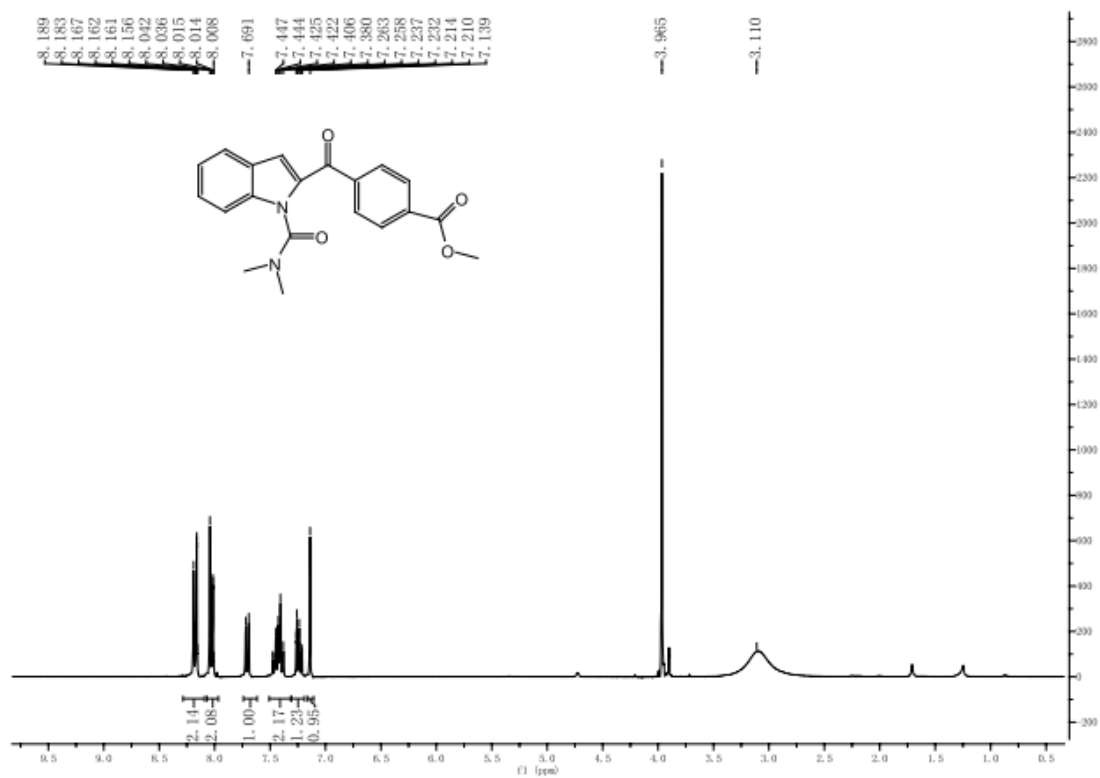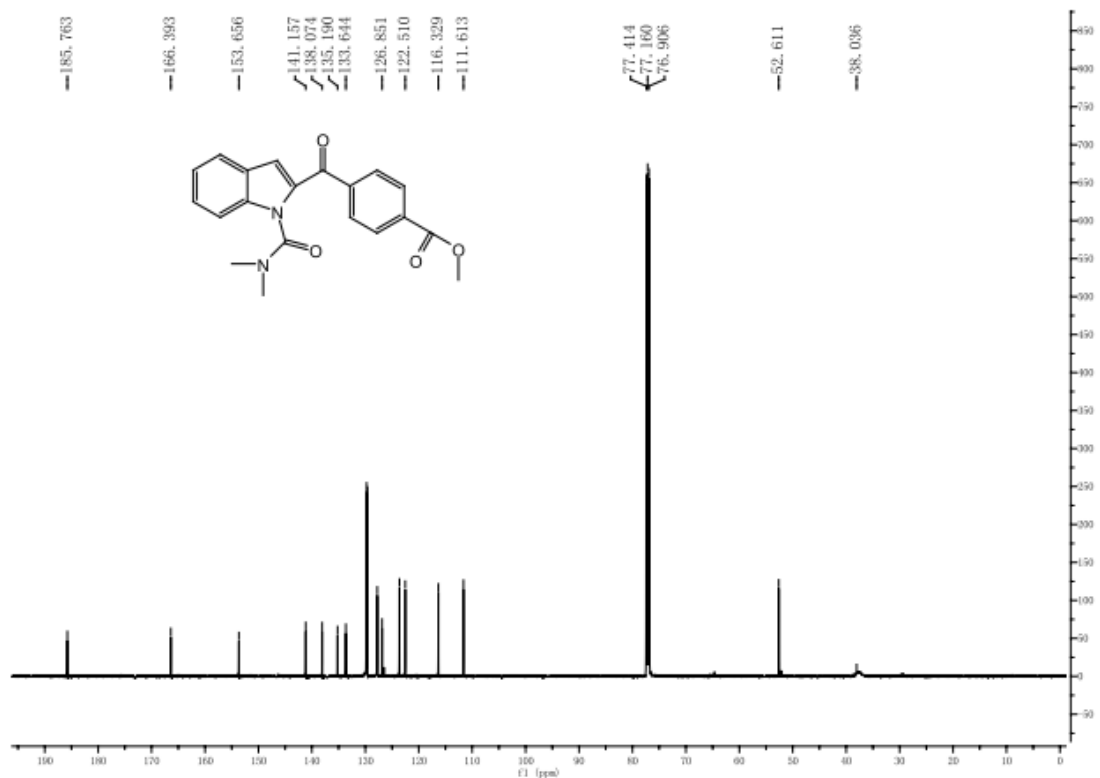

### *N,N*-Dimethyl-2-(4-chlorobenzoyl)-1H-indole-1-carboxamide (3n)

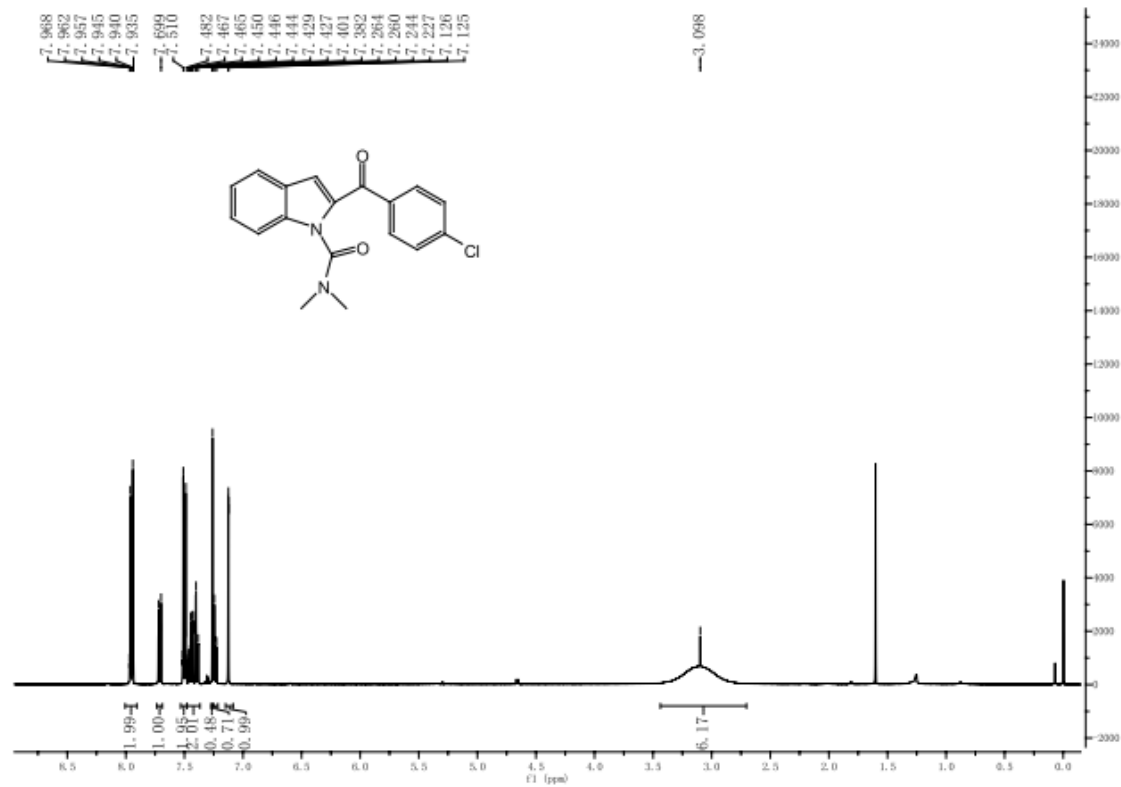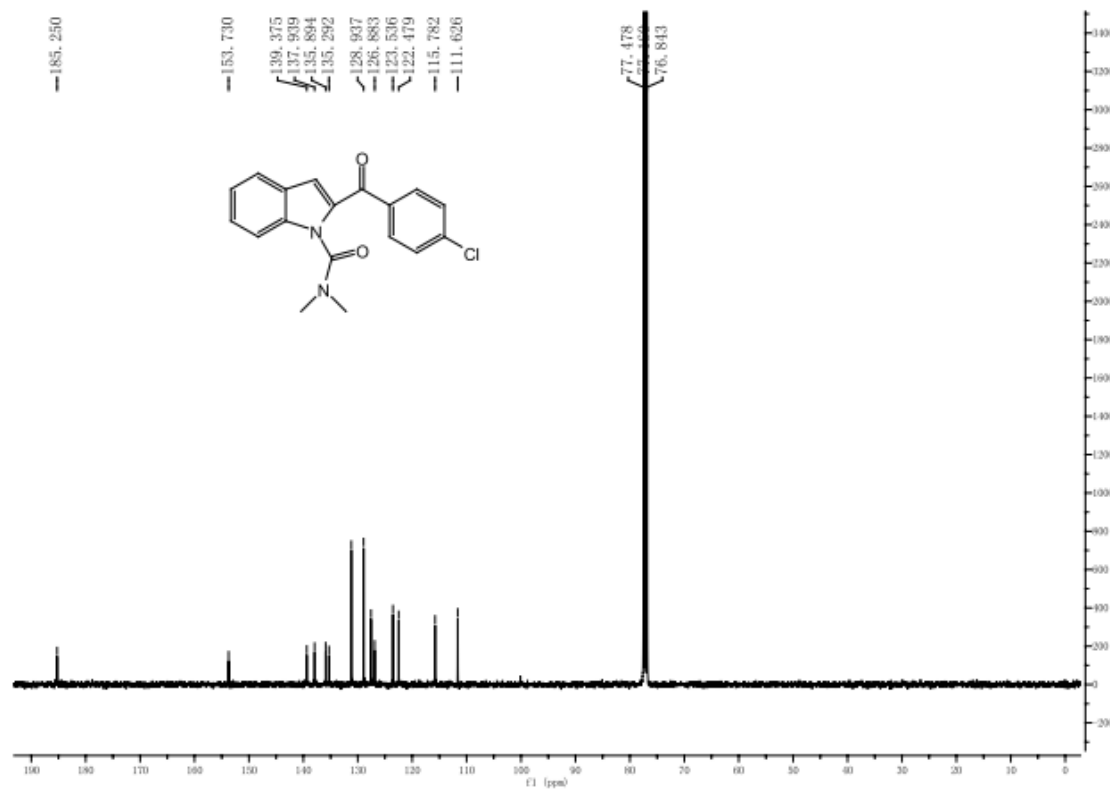

### N,N-Dimethyl-2-(4-bromobenzoyl)-1H-indole-1-carboxamide (3o)

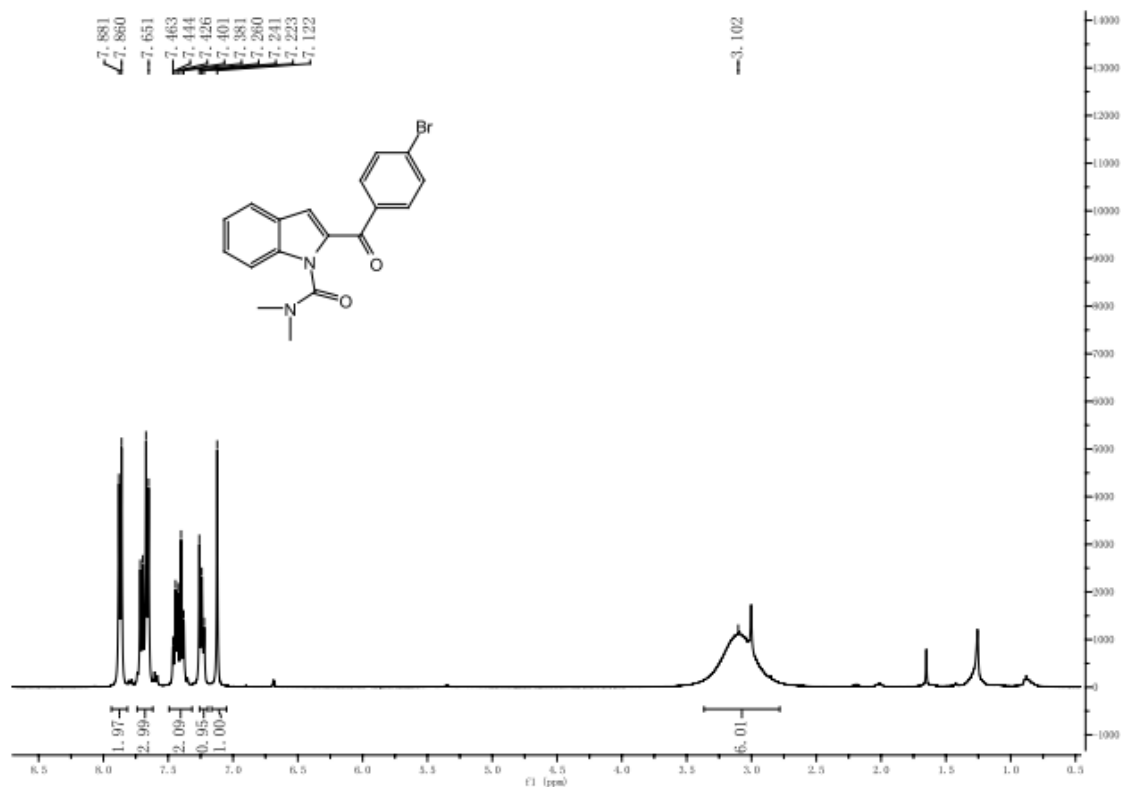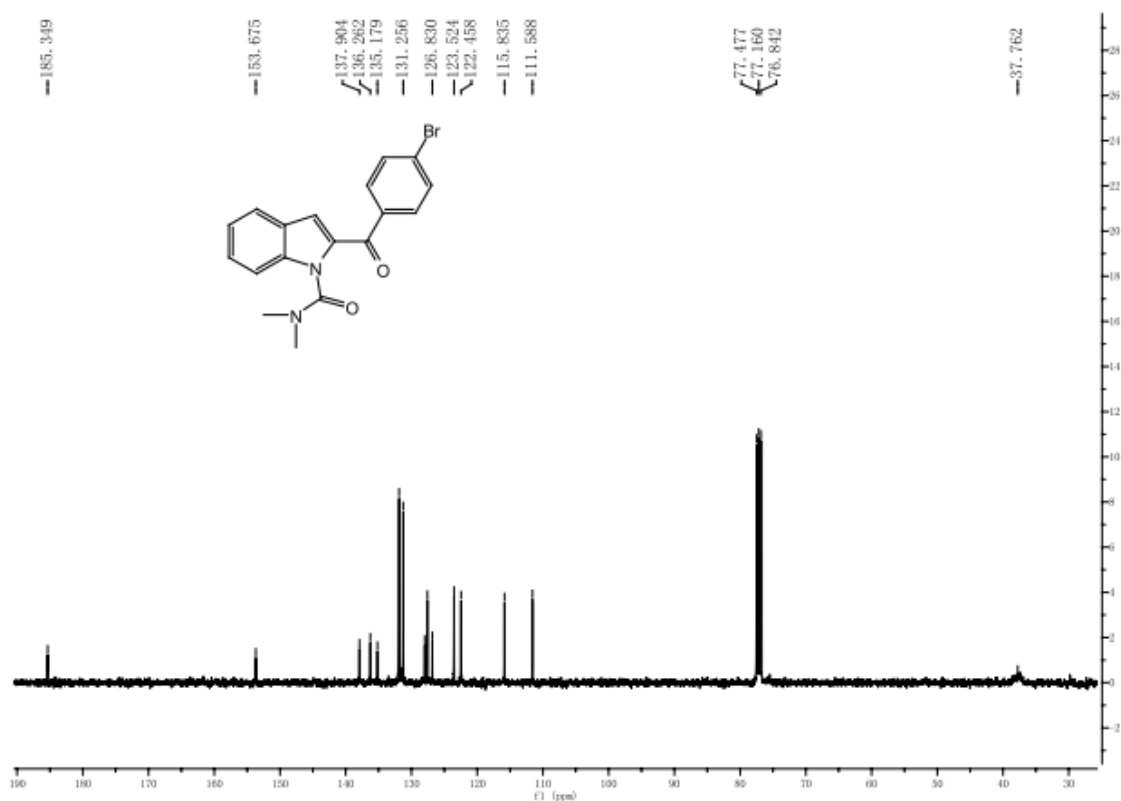

### *N,N*-Dimethyl-2-(3-methoxybenzoyl)-1*H*-indole-1-carboxamide (3p)

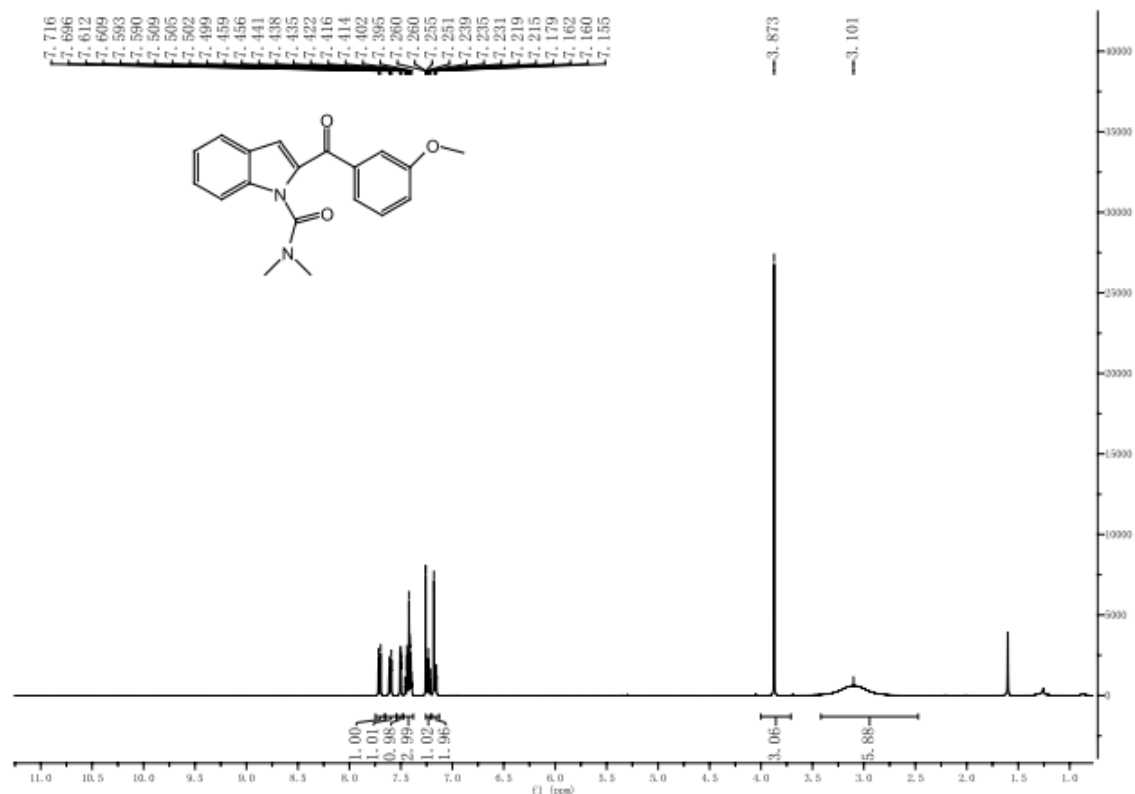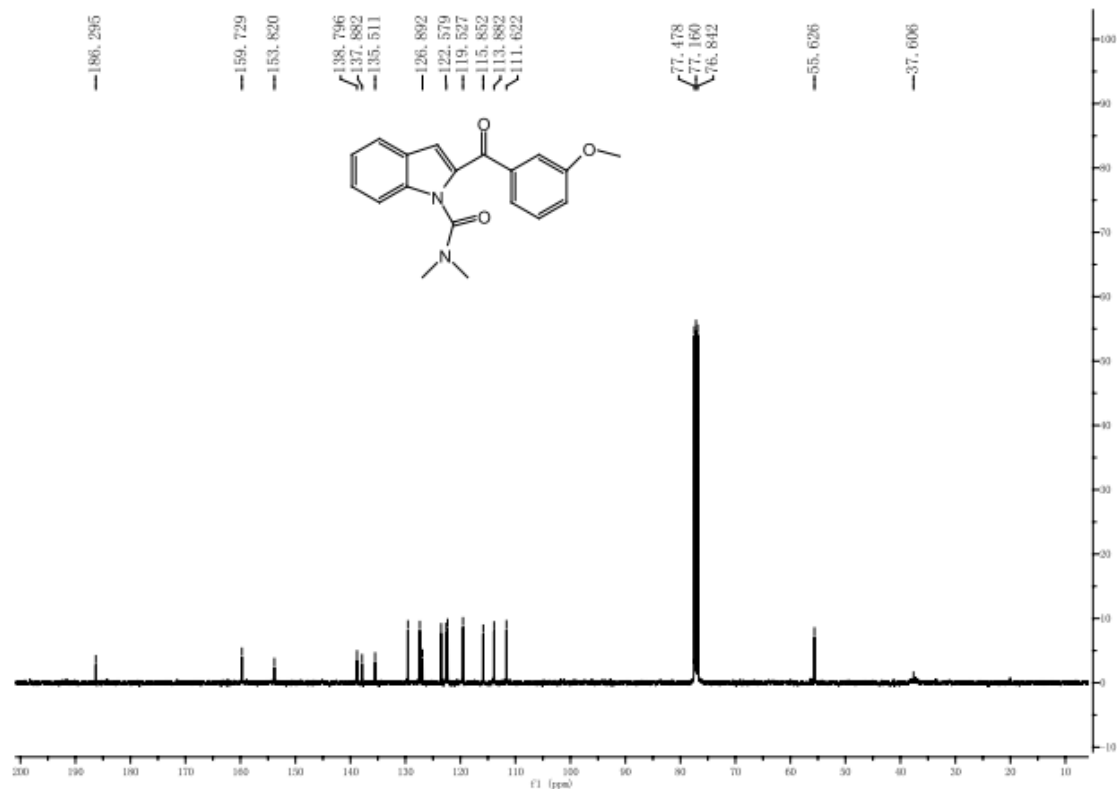

### *N,N*-Dimethyl-2-(3-trifluoromethylbenzoyl)-1*H*-indole-1-carboxamide (3q)

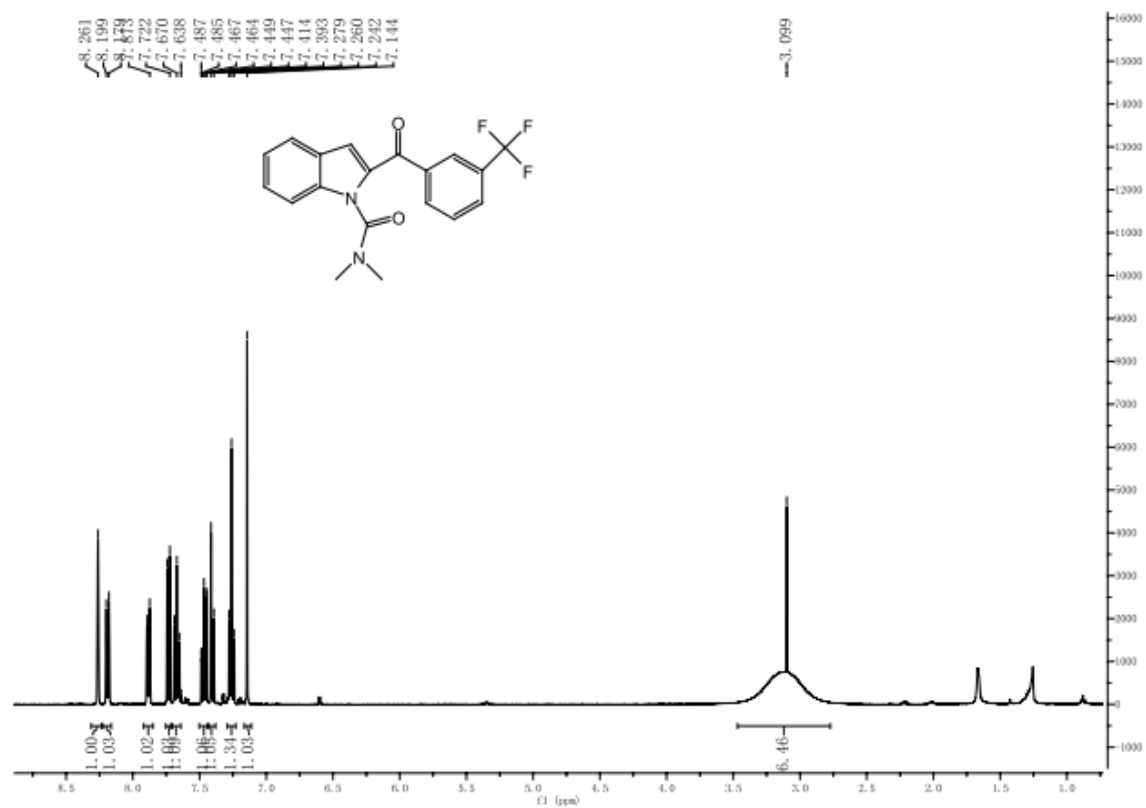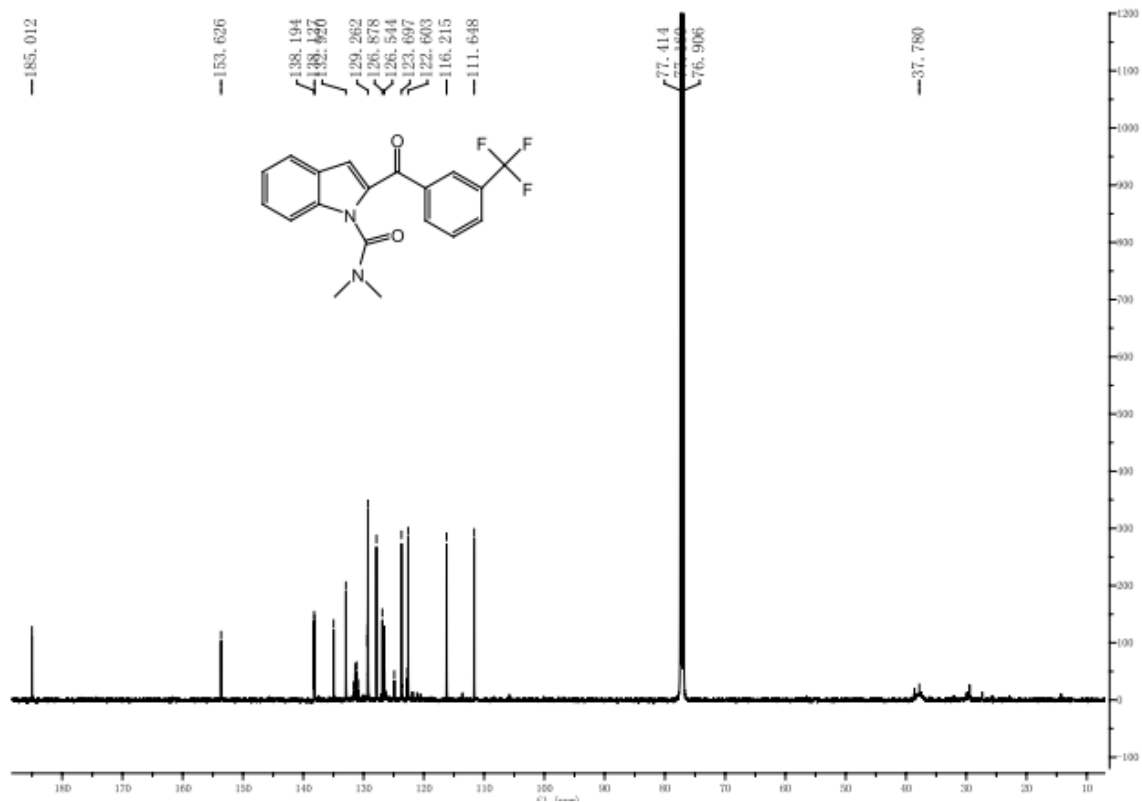



### *N,N*-Dimethyl-2-(2-methoxybenzoyl)-1*H*-indole-1-carboxamide (3r)

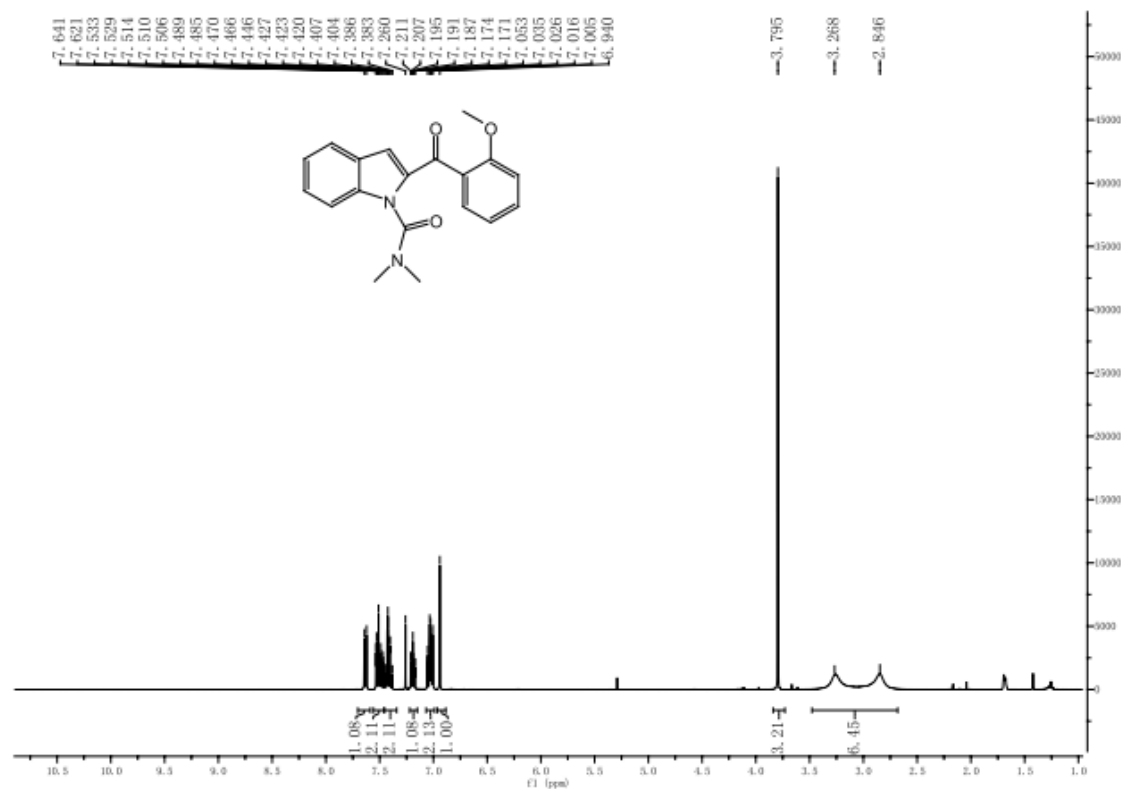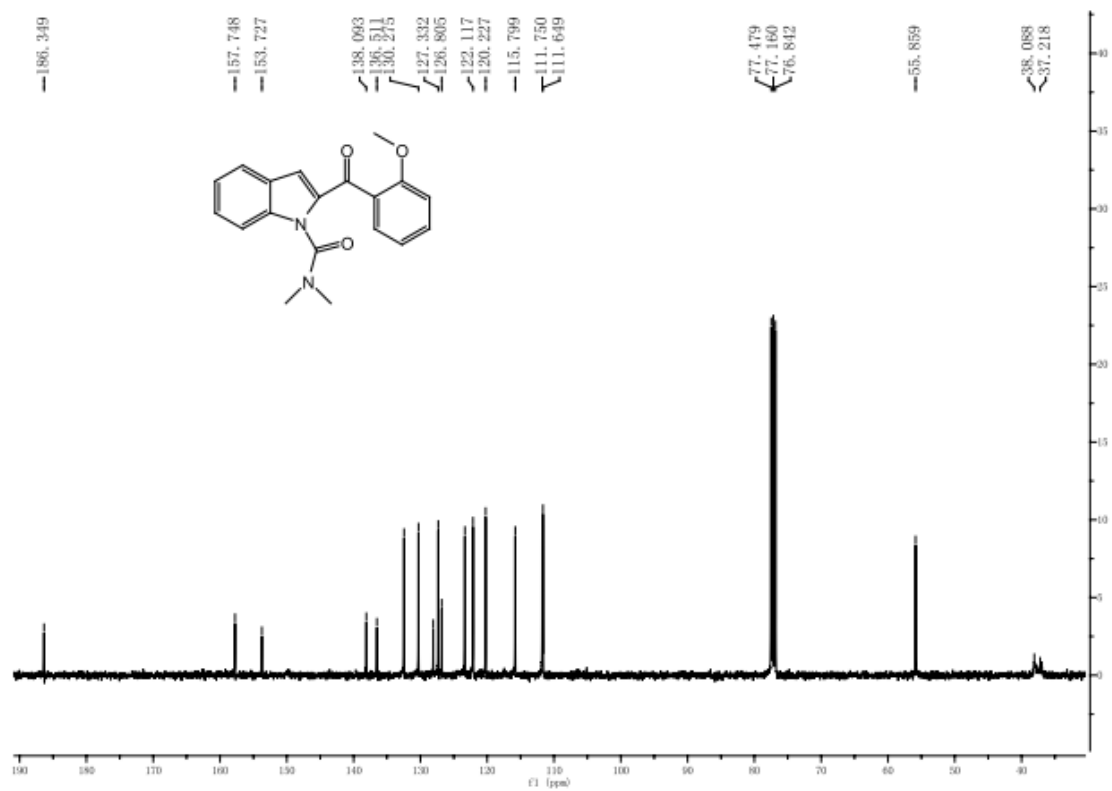

### *N,N*-Dimethyl-2-(2-(trifluoromethyl)benzoyl)-1*H*-indole-1-carboxamide (3s)

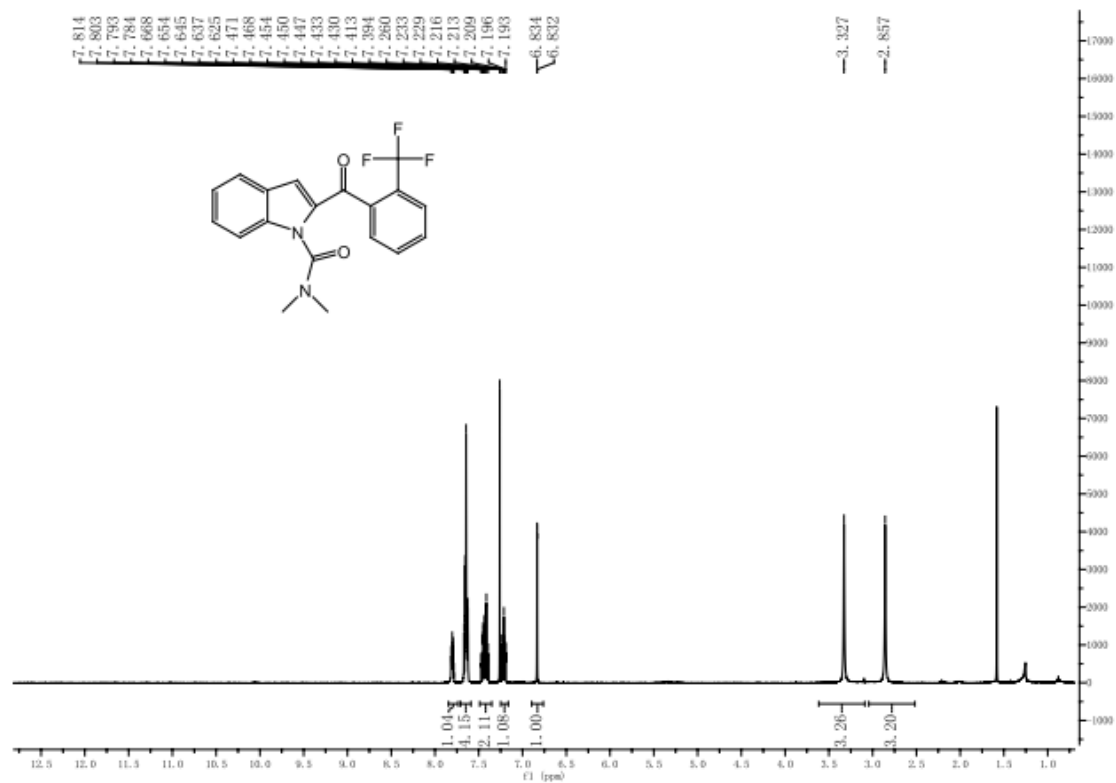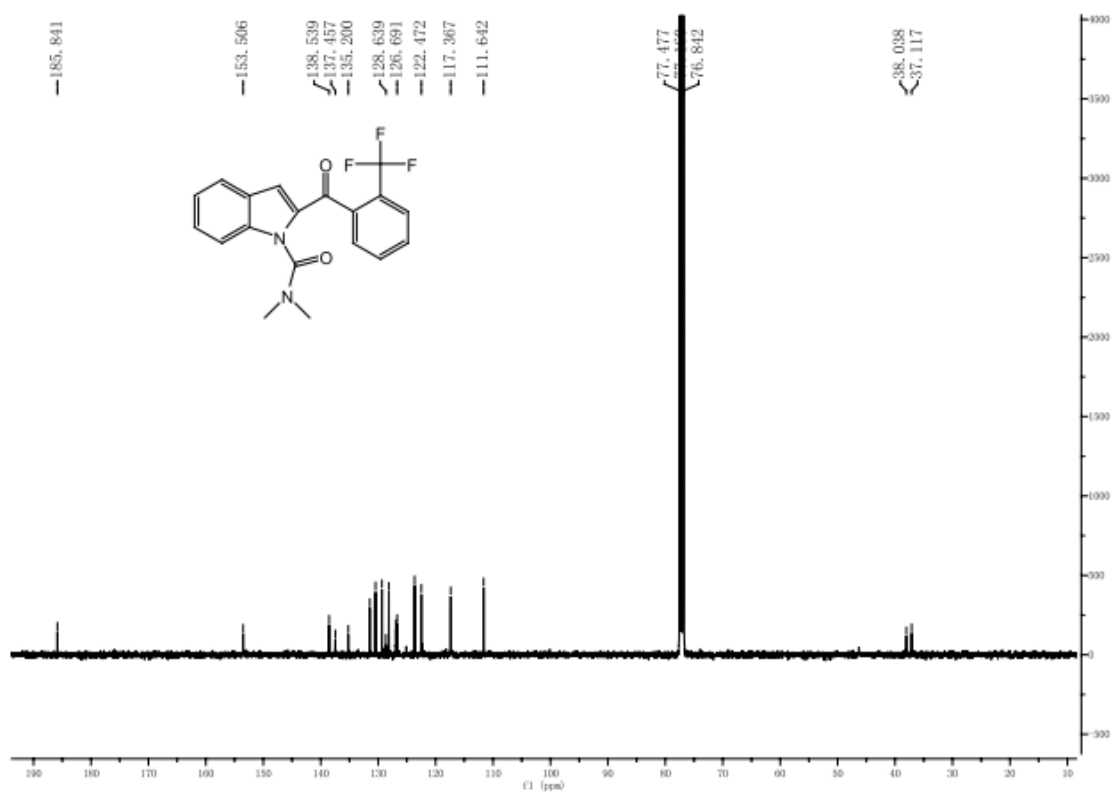

***N,N*-Dimethyl-2-(Benzo-[1,3]-dioxole-5-carbonyl)-1H-indole-1-carboxamide (3t)**

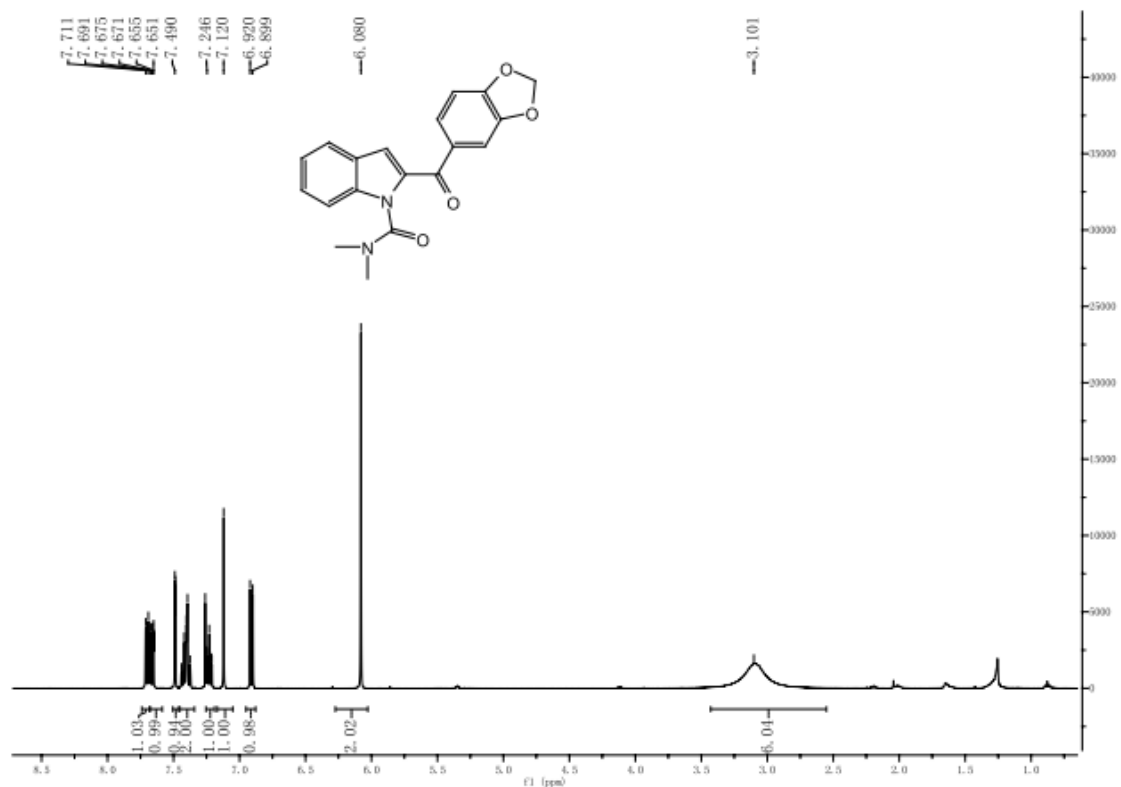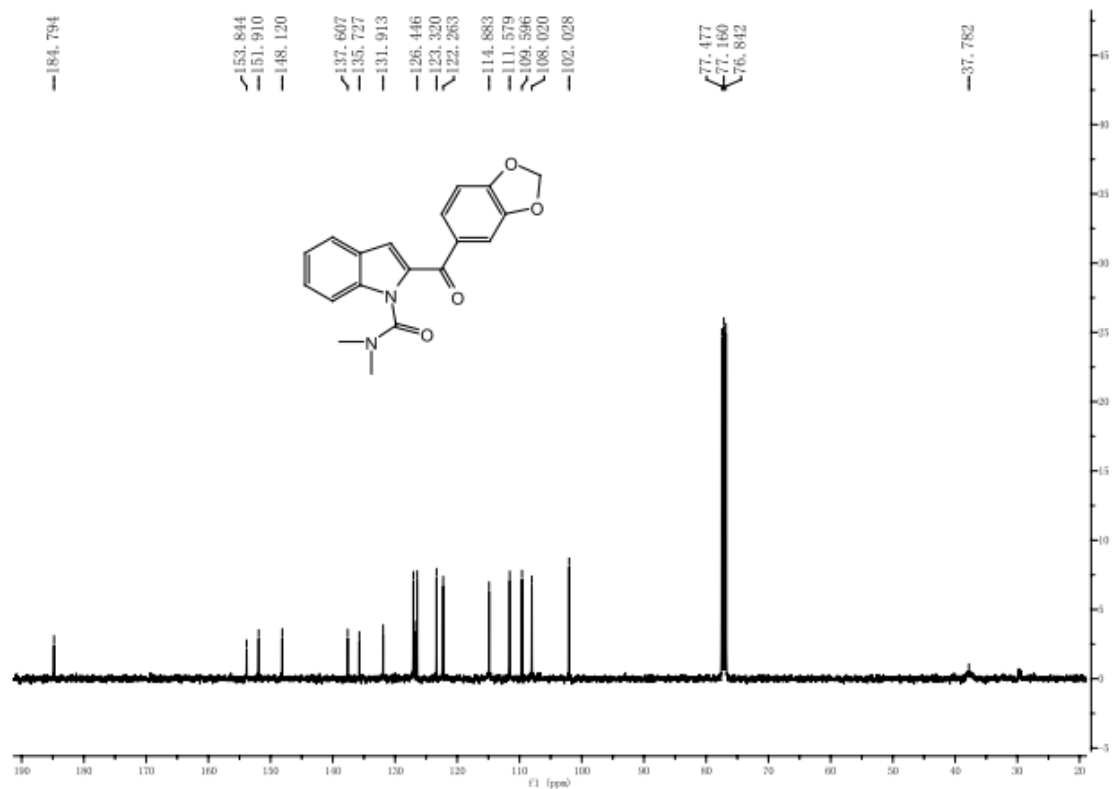

### *N,N*-Dimethyl-2-(1-Naphthoyl)-1H-indole-1-carboxamide (3u)

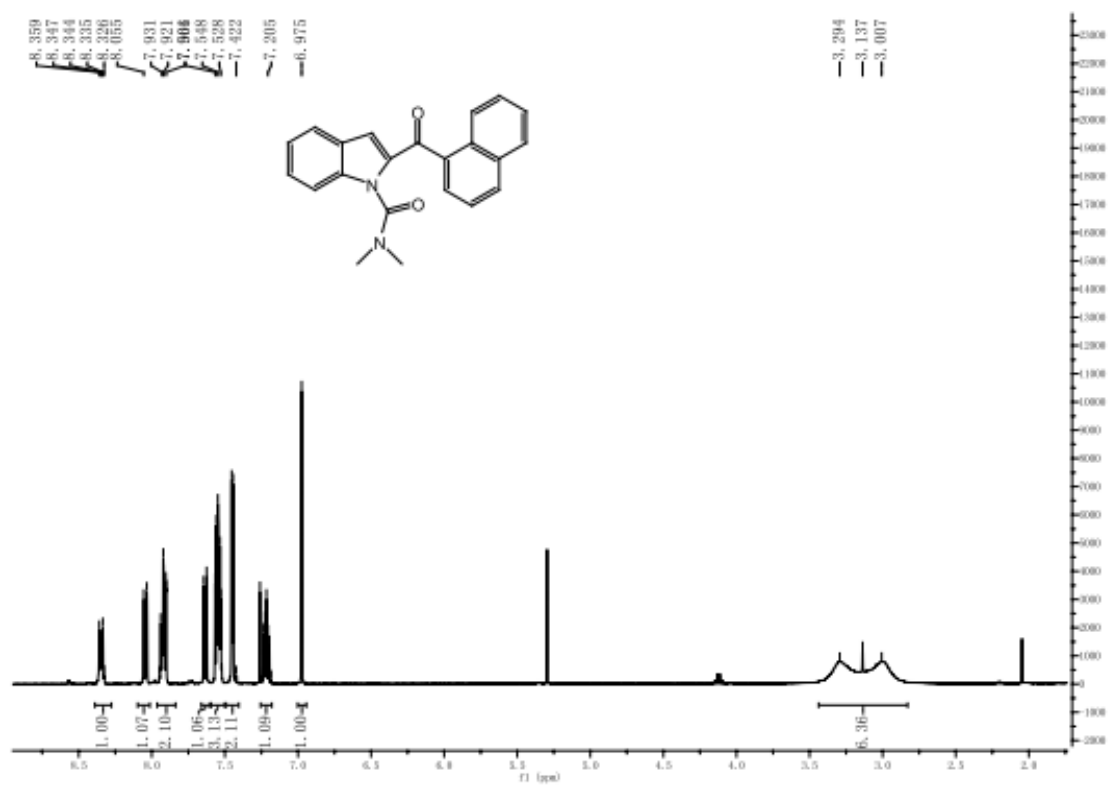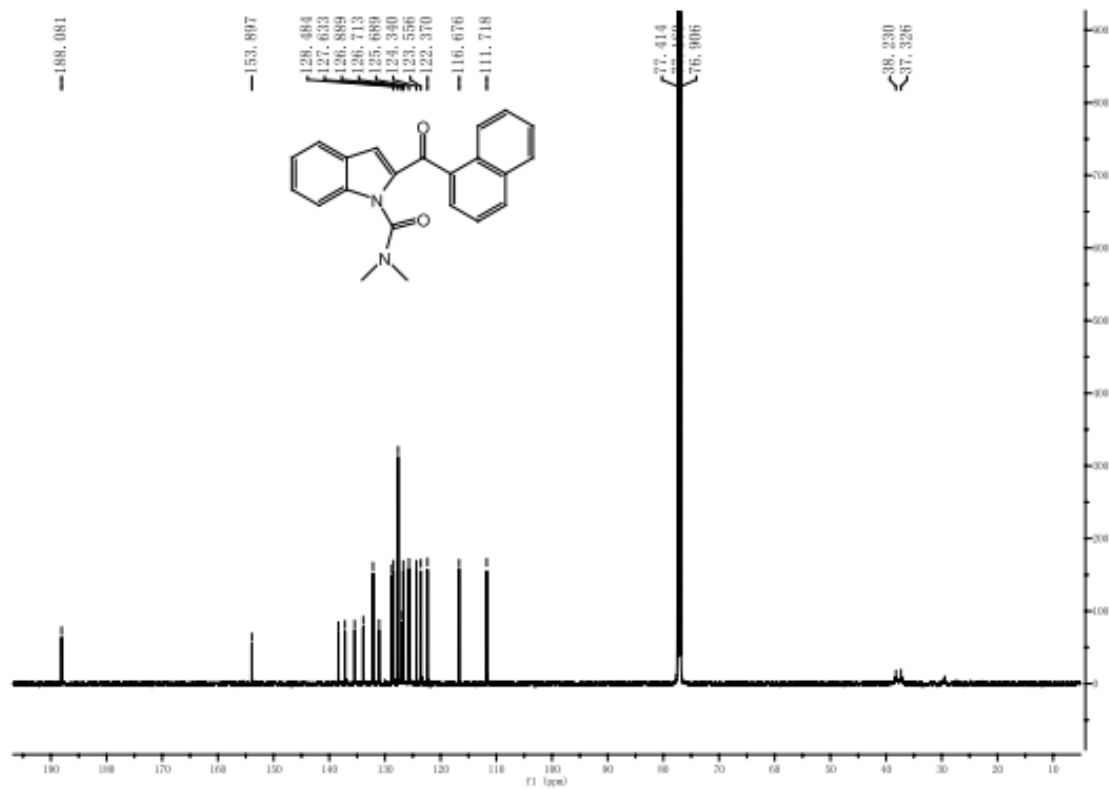

### *N,N*-Dimethyl-2-(furan-2-carbonyl)-1H-indole-1-carboxamide (3v)

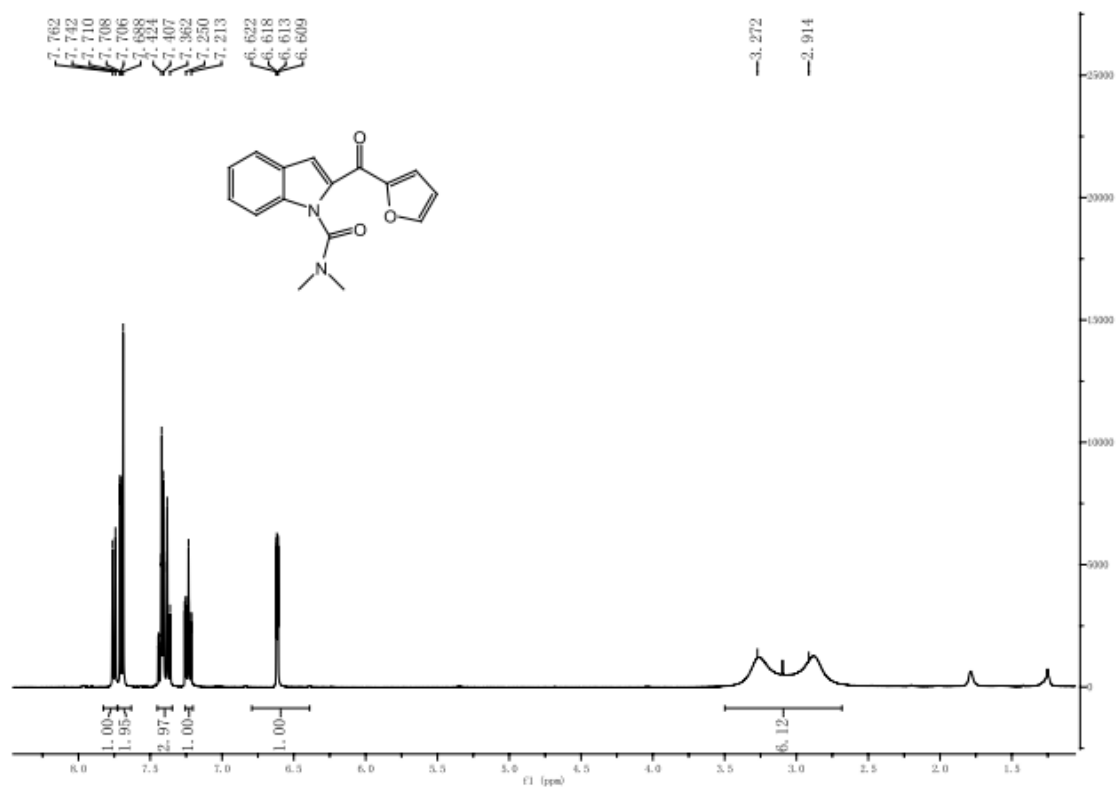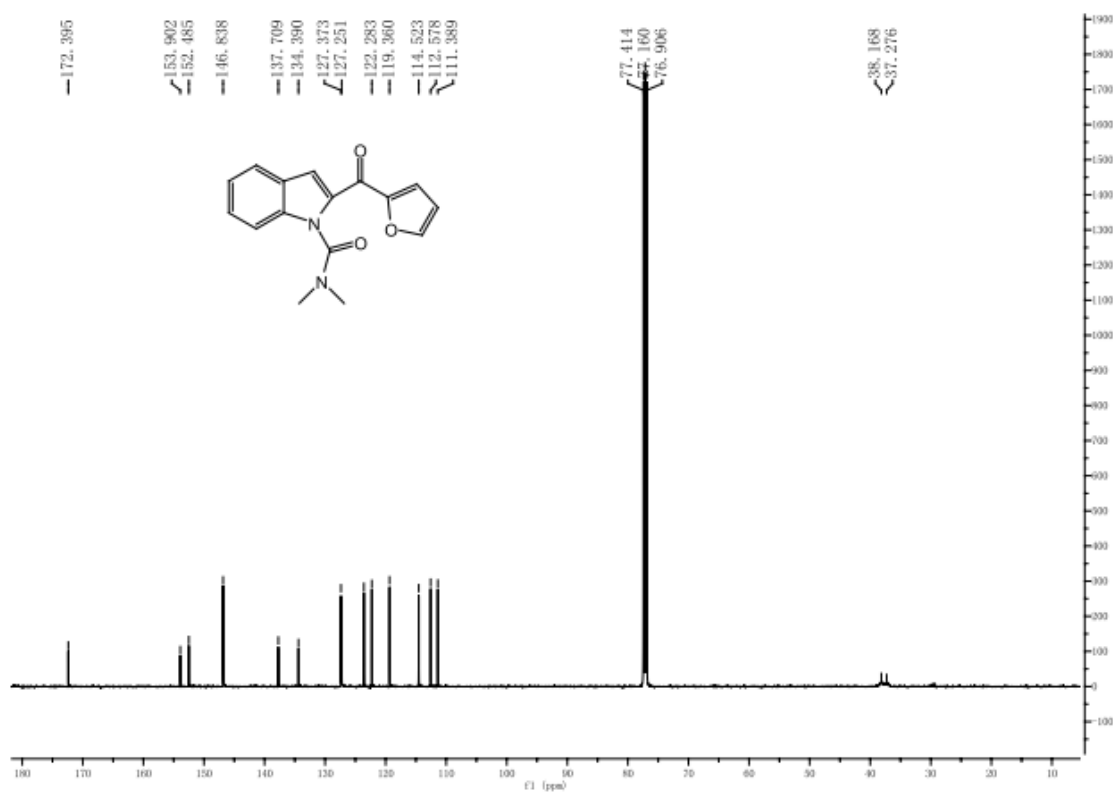

### *N,N*-Dimethyl-2-(thiophene-2-carbonyl)-1H-indole-1-carboxamide (3w)

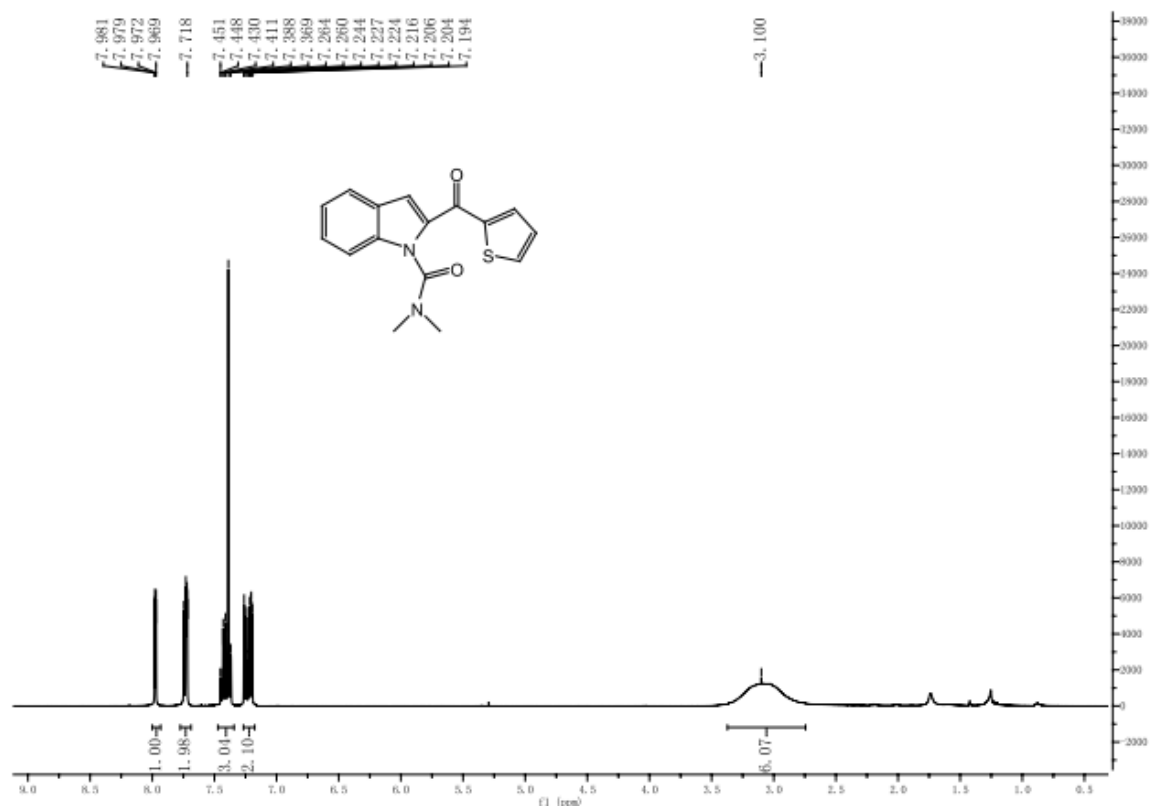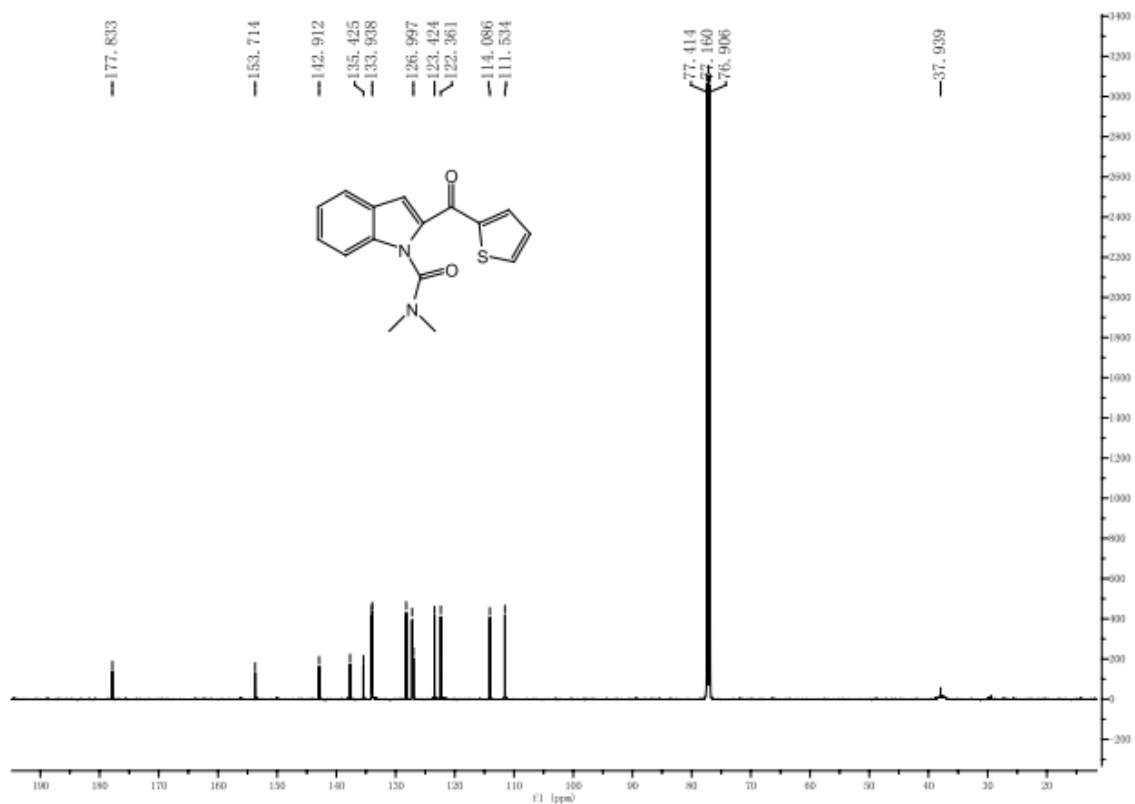

### *N,N*-Dimethyl-2-butyryl-1H-indole-1-carboxamide (3x)

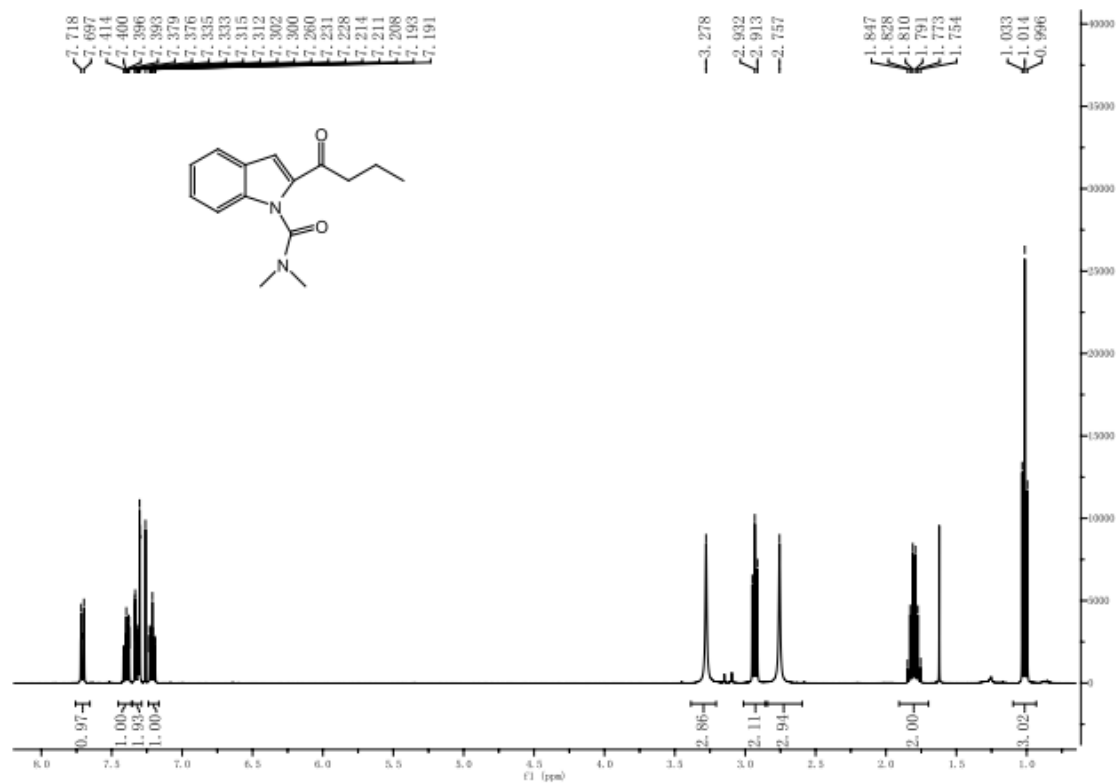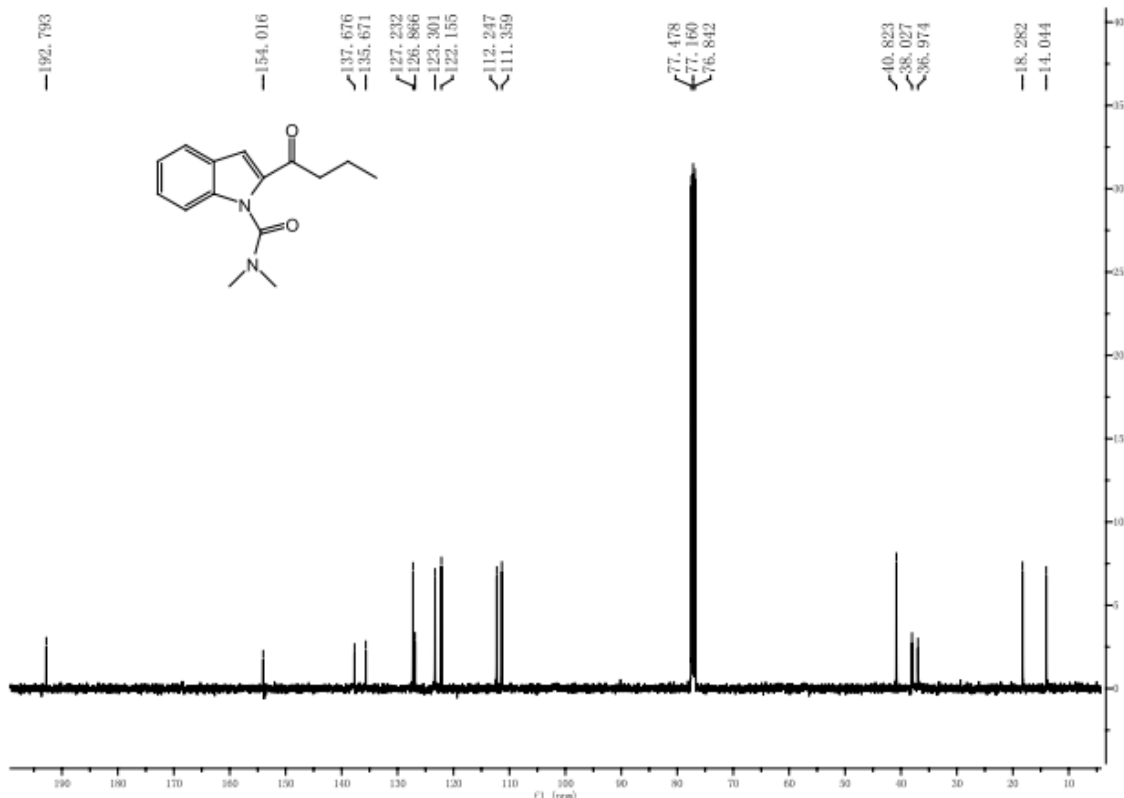

### N,N-Dimethyl-2-cyclohexanecarbonyl-1H-indole-1-carboxamide (3y)

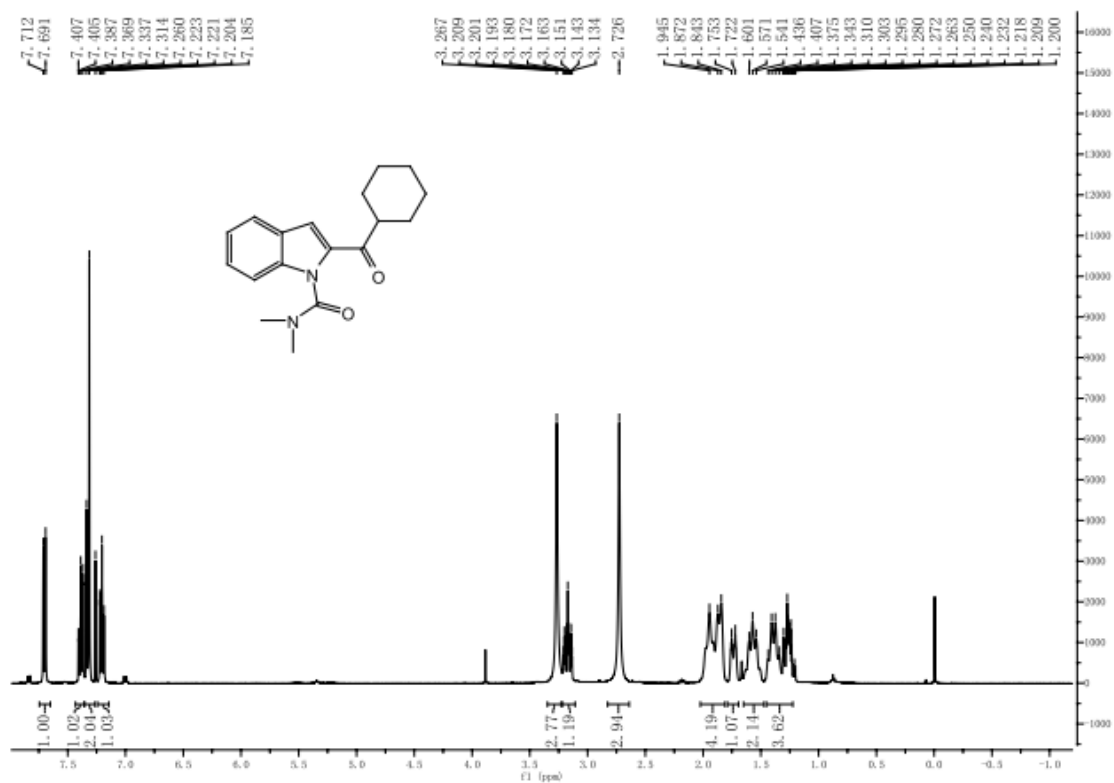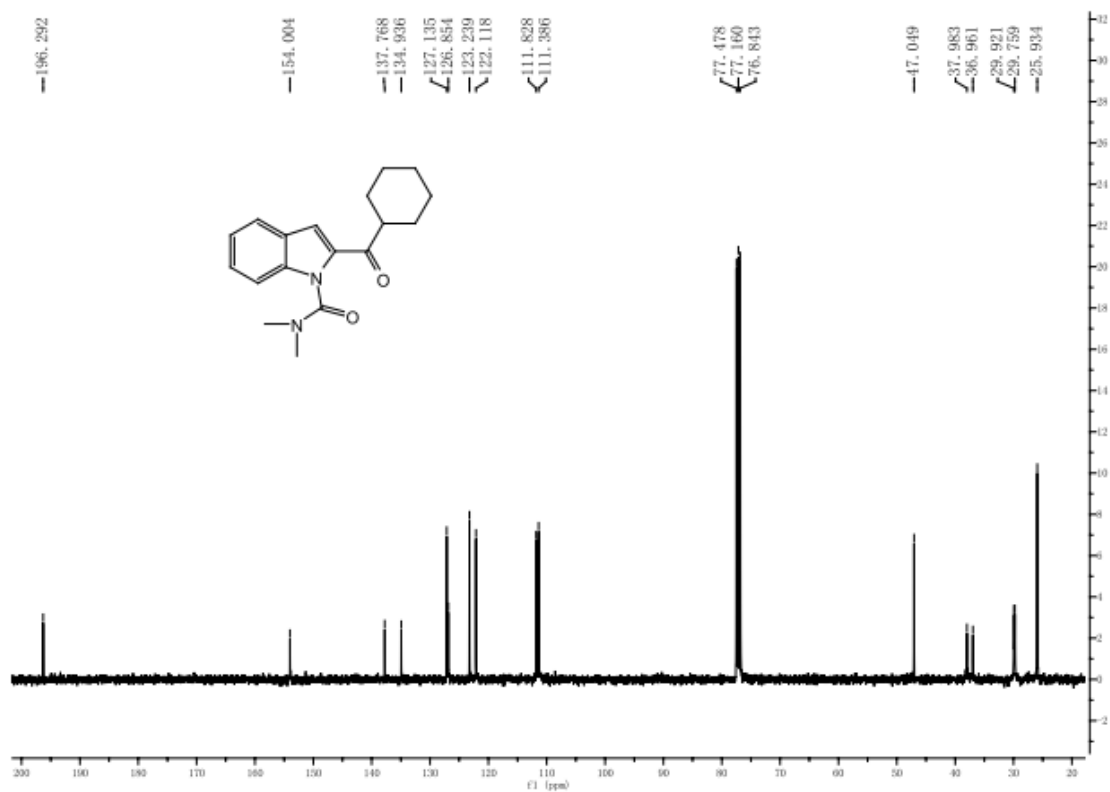



### *N,N'*-Bis(*N,N*-dimethylcarbamoyl)-2,2'-biindolyl (**3z**)

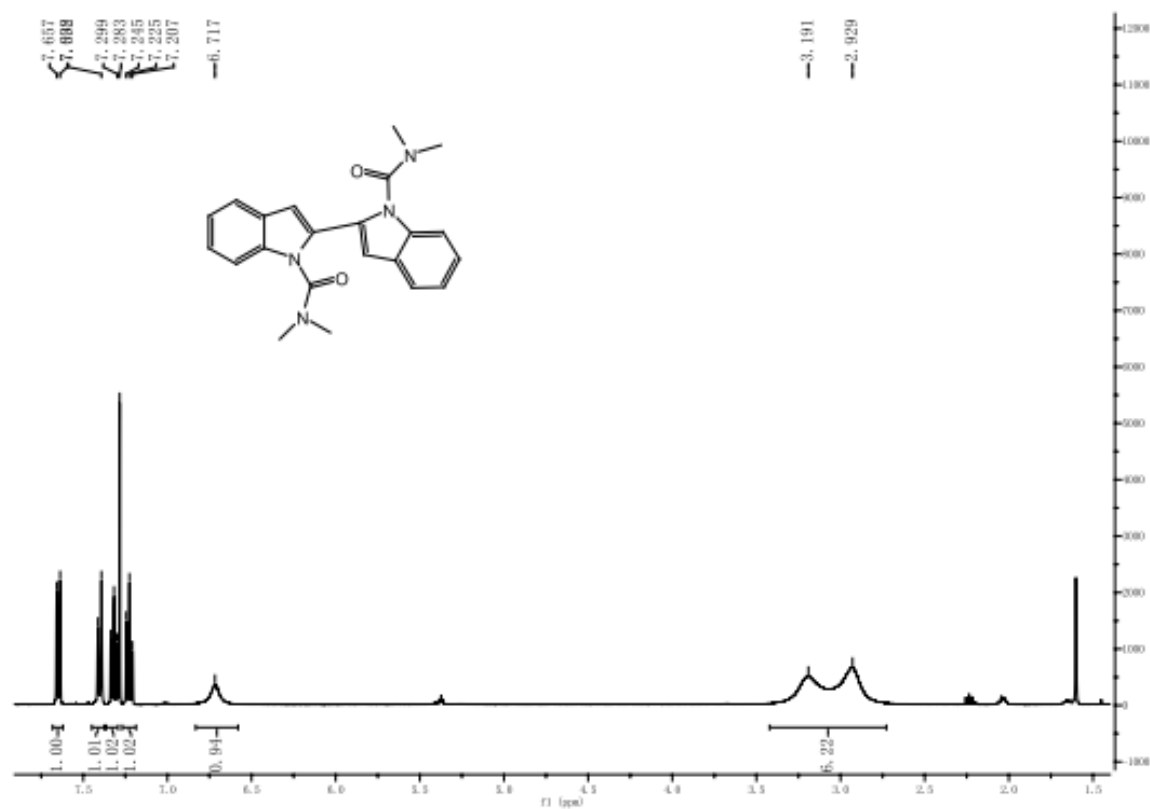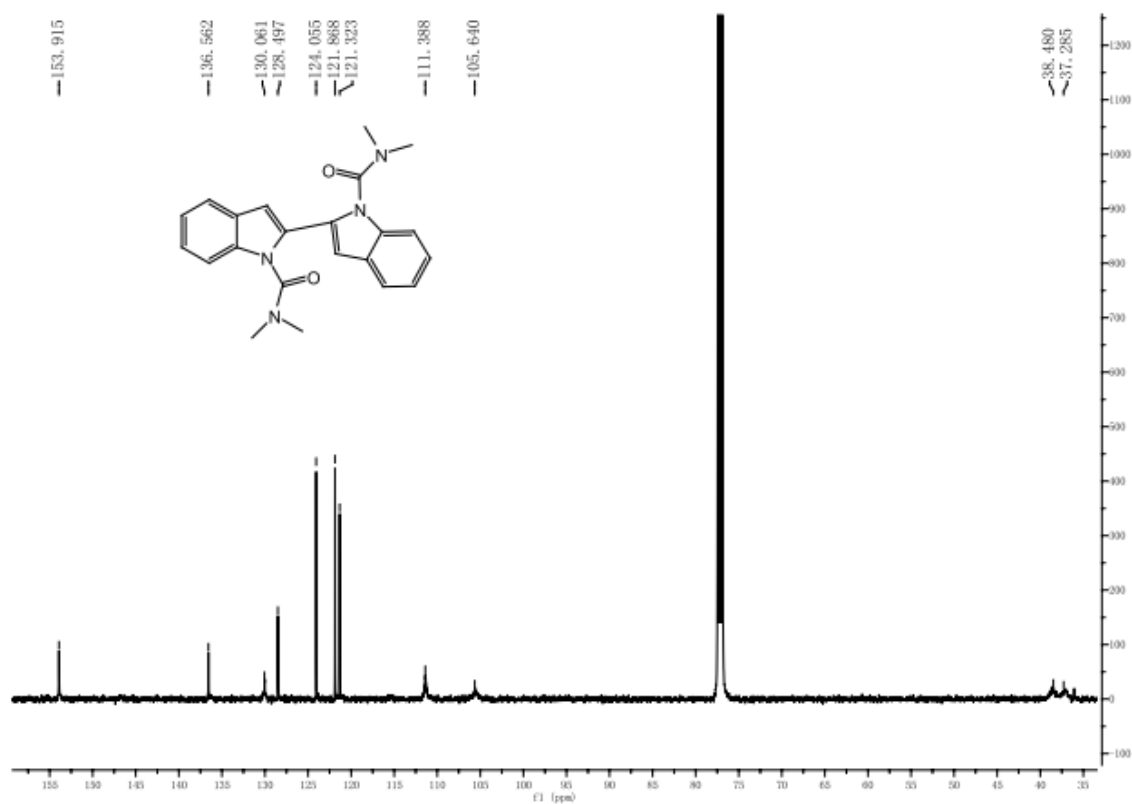

### 6-nitro-*N,N*-Dimethyl-2-benzoyl-1H-indole-1-carboxamide (4g)

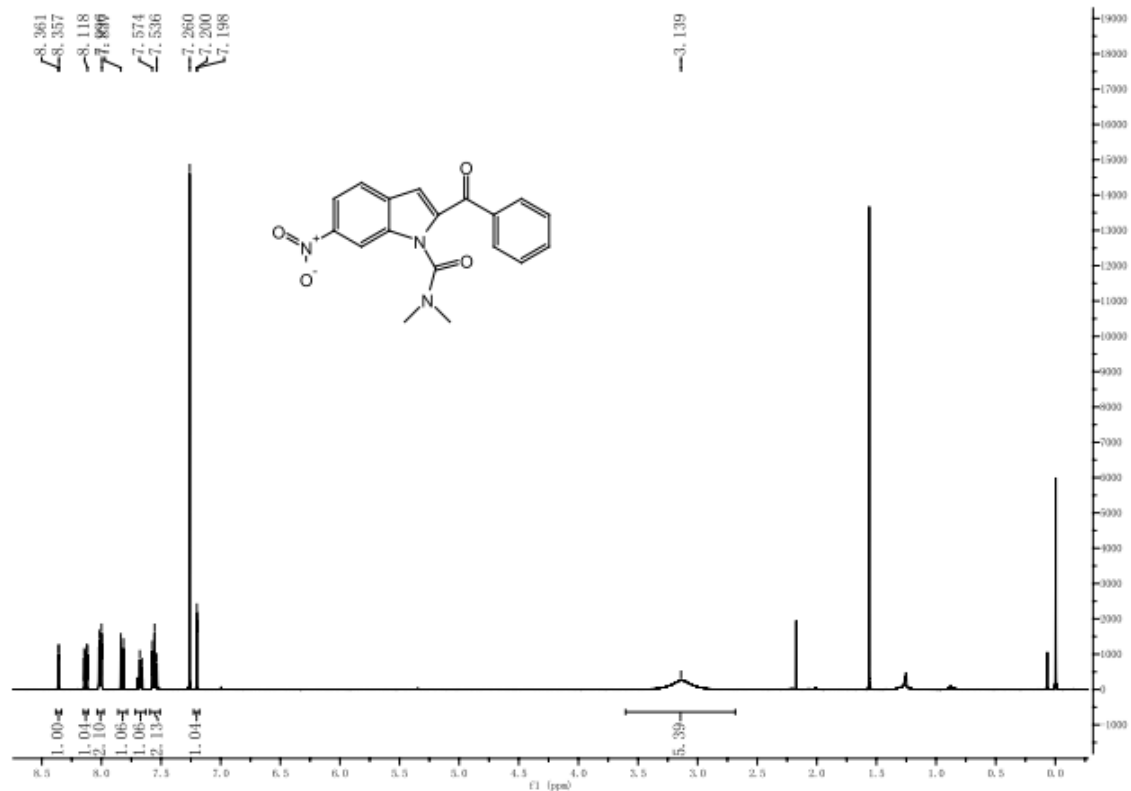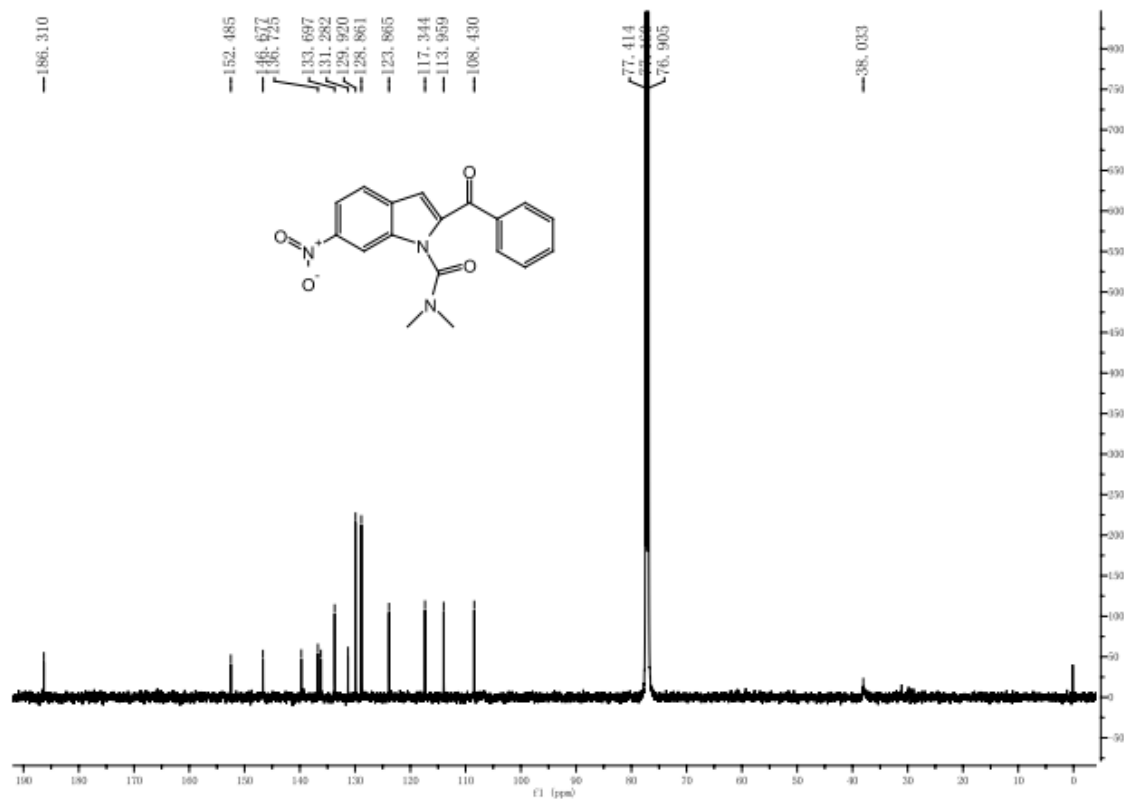

### 6-trifluoromethyl-*N,N*-Dimethyl-2-benzoyl-1H-indole-1-carboxamide (4h)

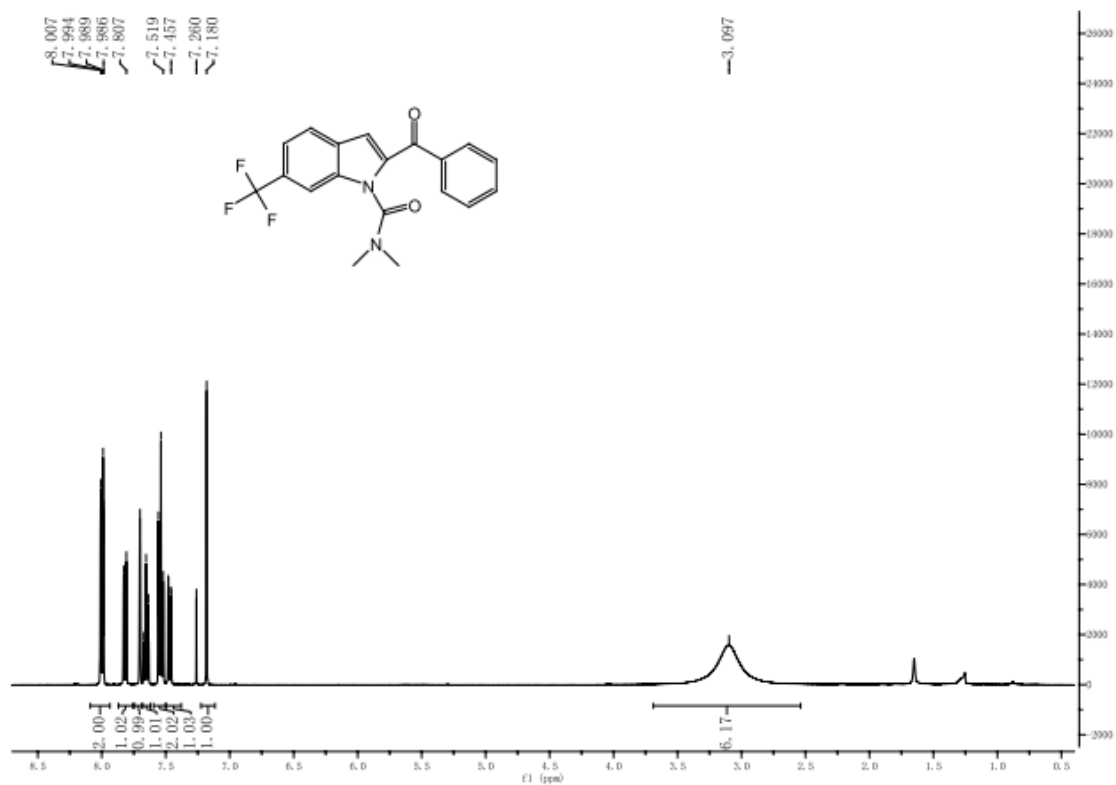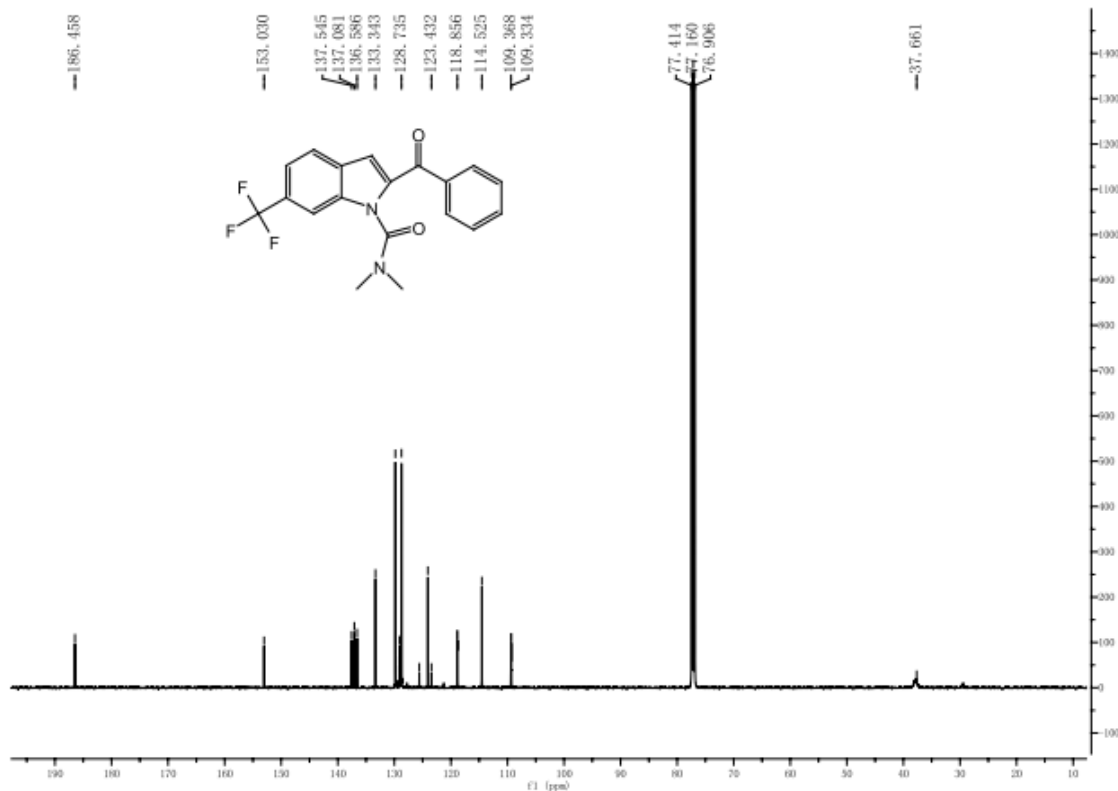

### 6-methoxy-*N,N*-Dimethyl-2-benzoyl-1H-indole-1-carboxamide (4i)

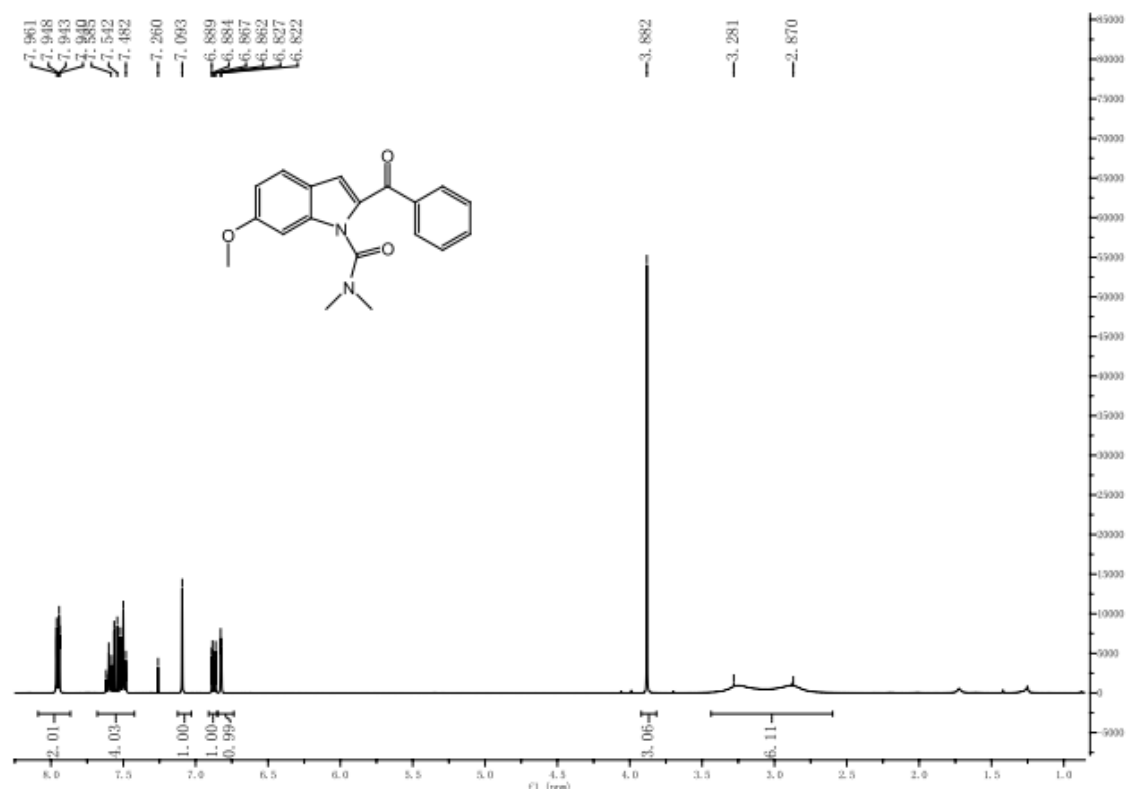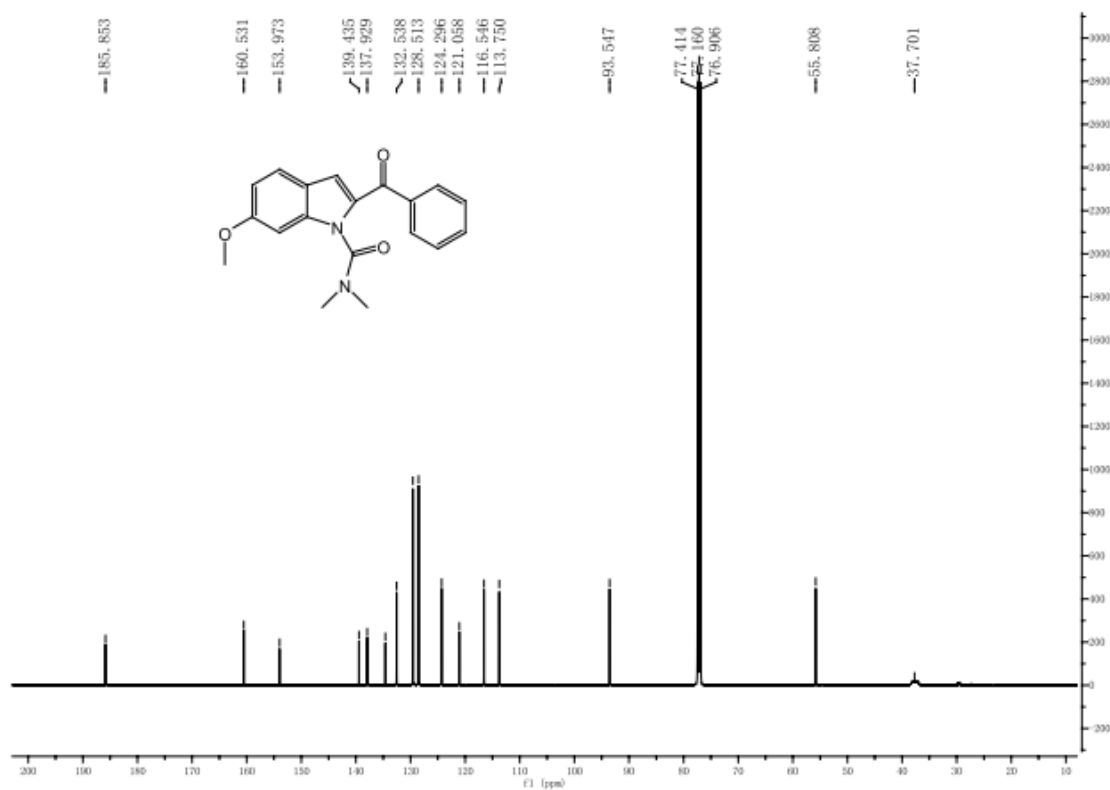

### 6-bromo-*N,N*-Dimethyl-2-benzoyl-1H-indole-1-carboxamide (4j)

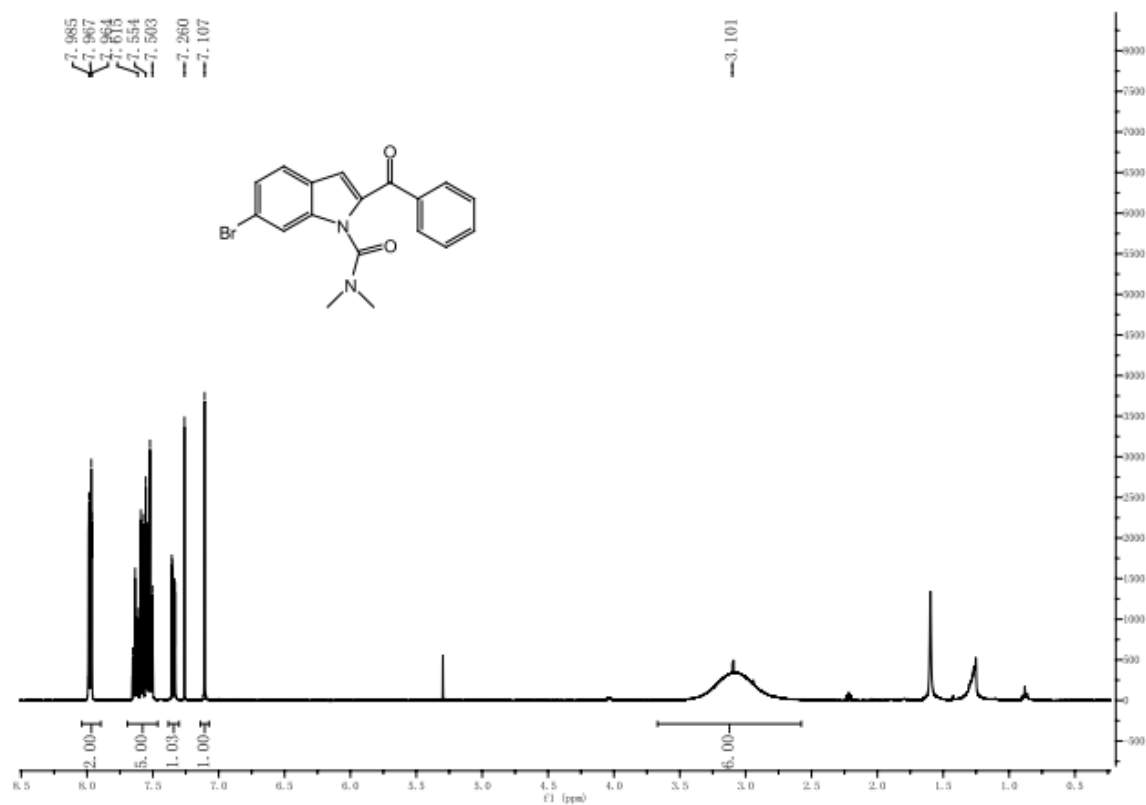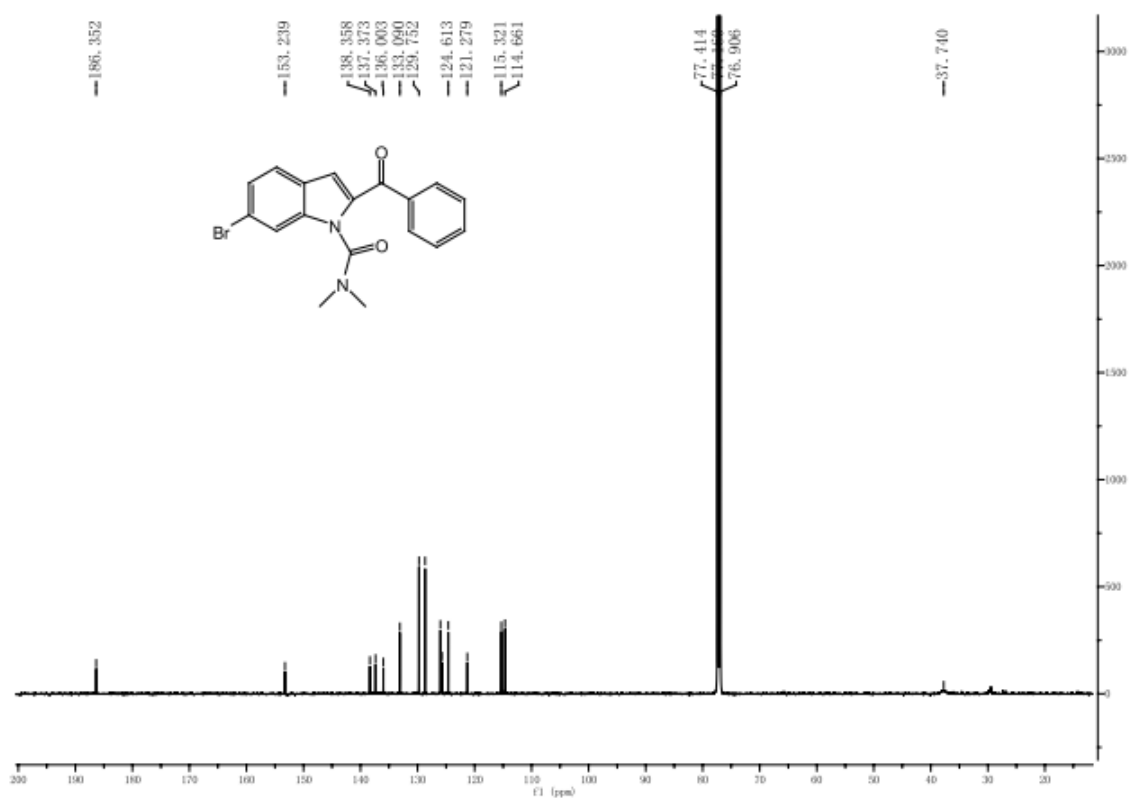

### 5-fluoro-*N,N*-Dimethyl-2-benzoyl-1H-indole-1-carboxamide (4k)

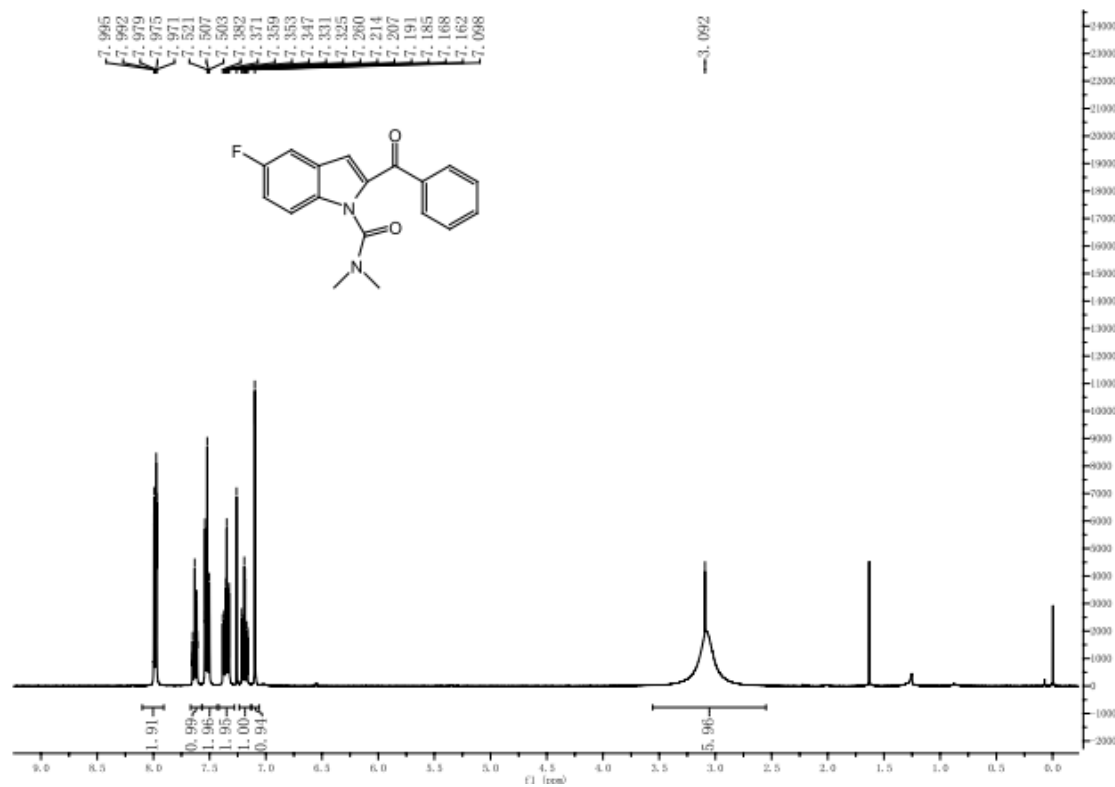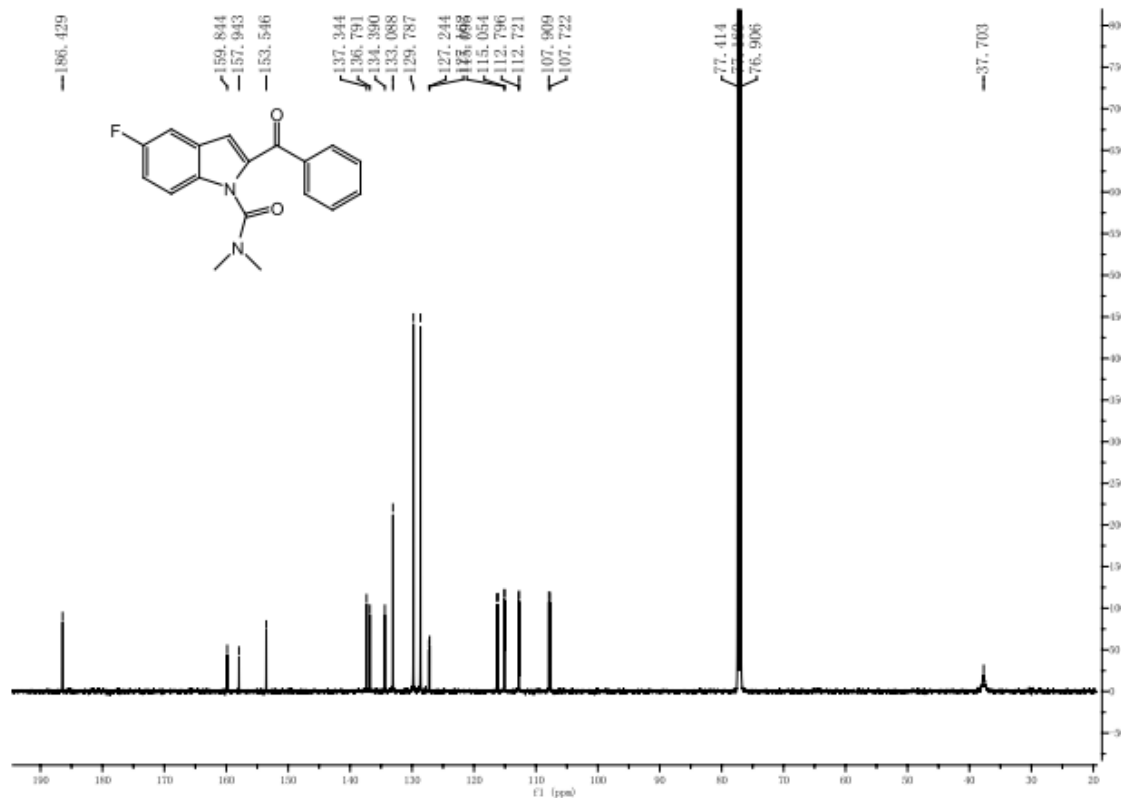

### 4-fluoro-*N,N*-Dimethyl-2-benzoyl-1H-indole-1-carboxamide (4I)

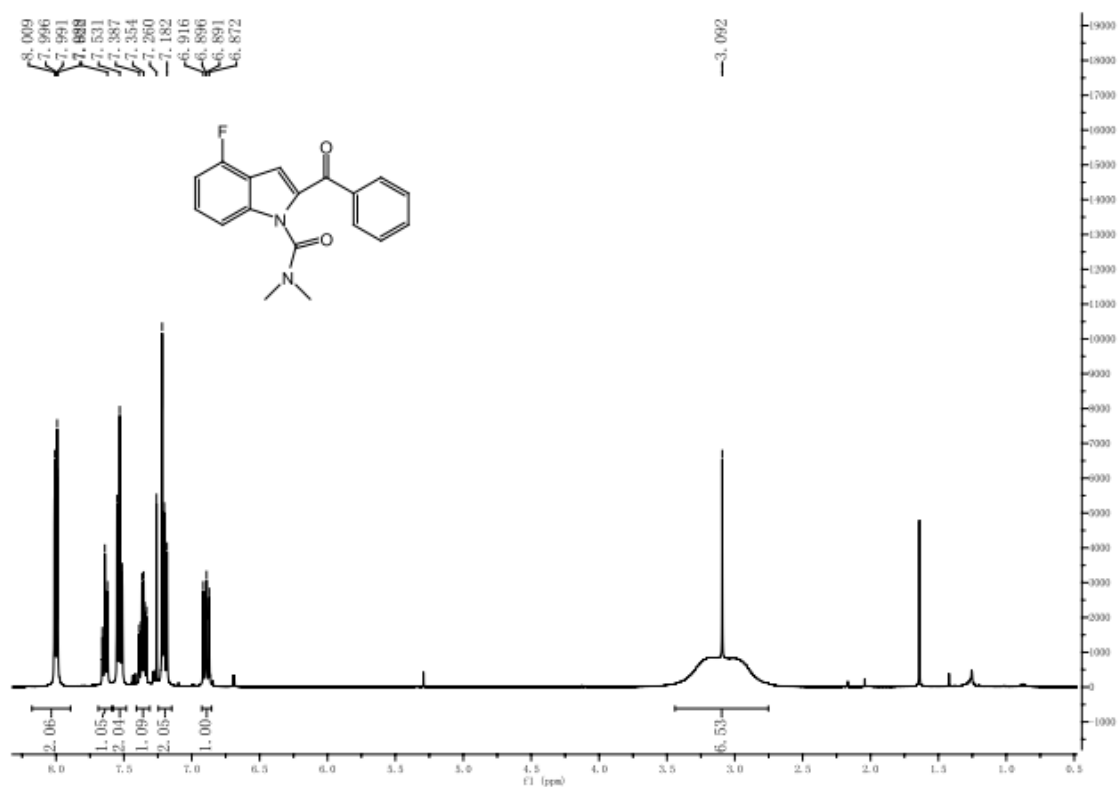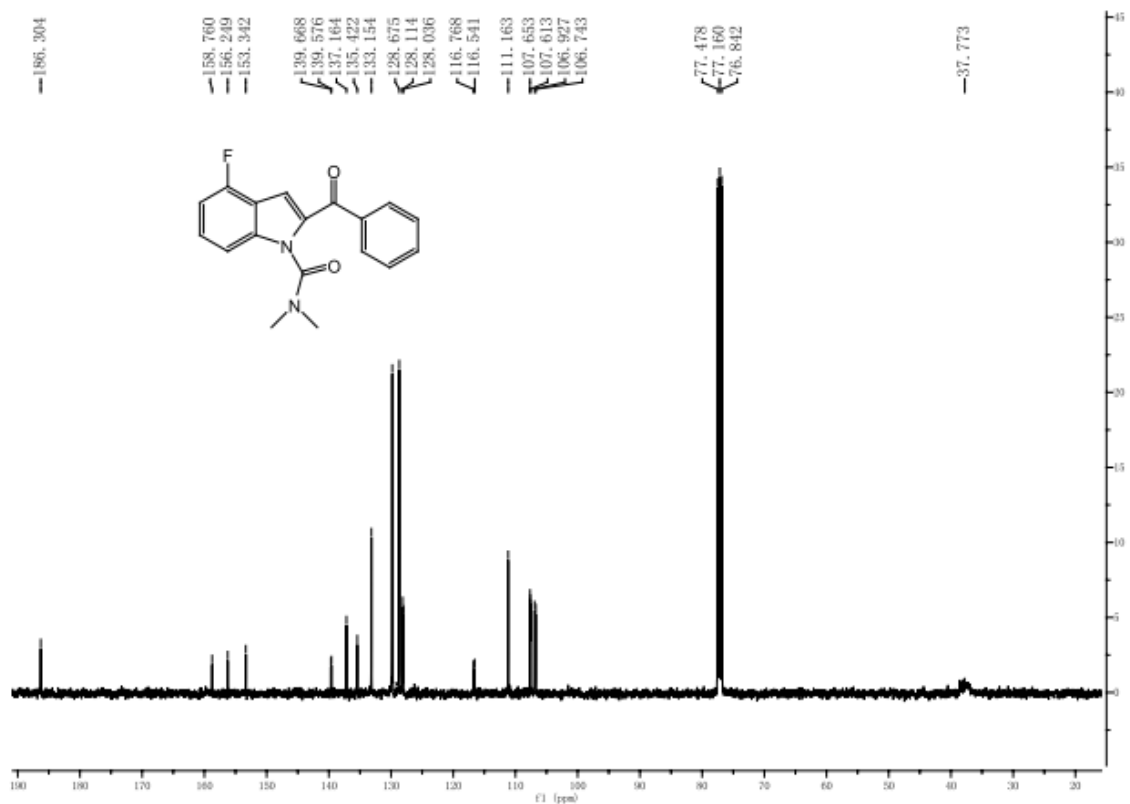

### *N,N*-Dimethyl-3-methyl-2-benzoyl-1*H*-indole-1-carboxamide (4m)

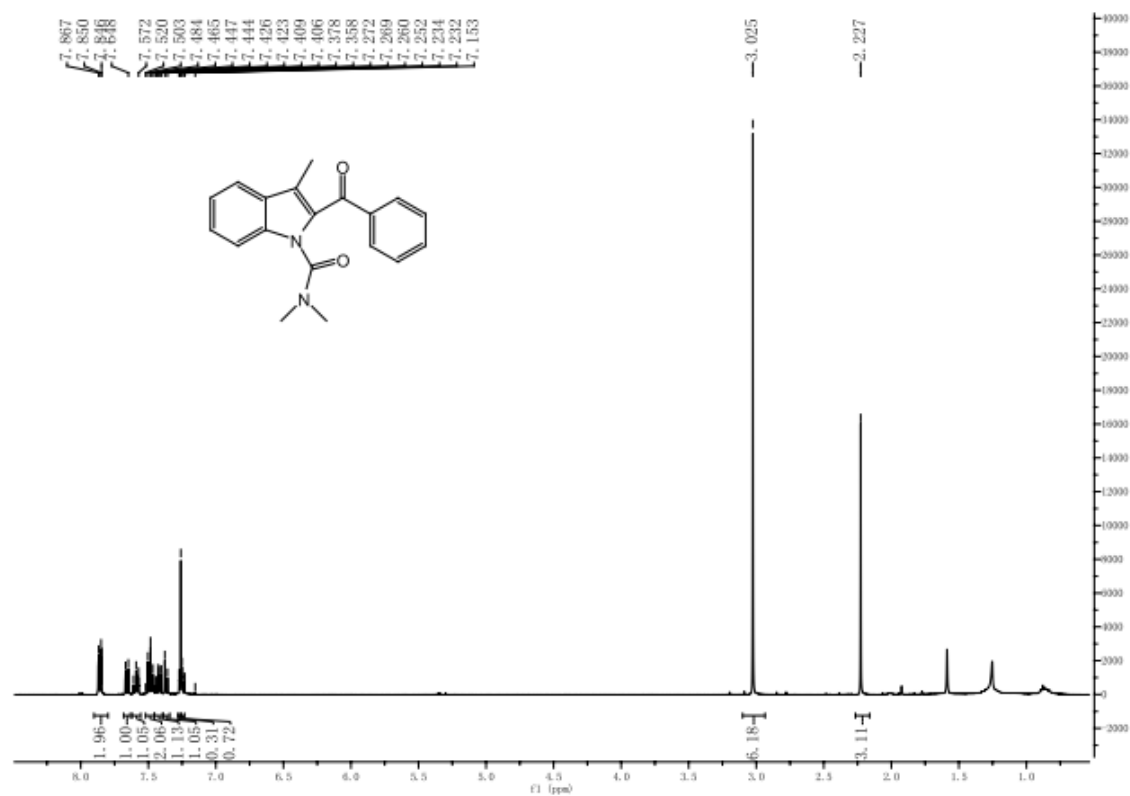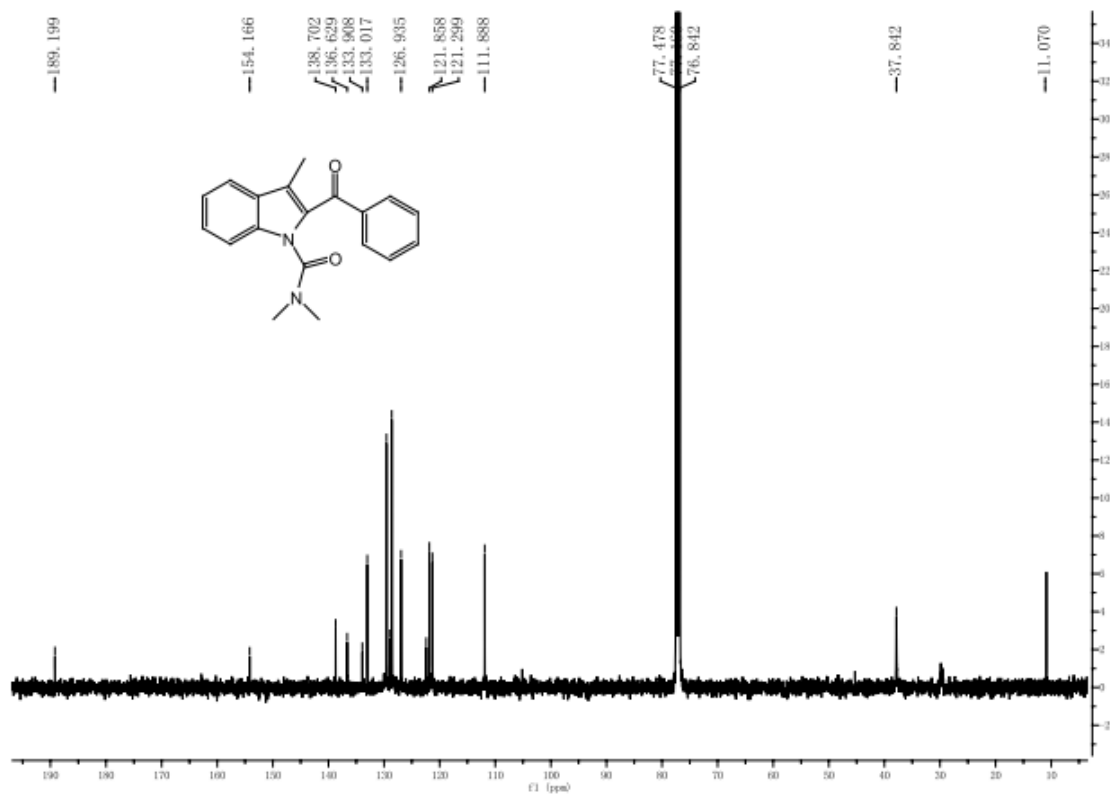



***N,N*-Dimethyl-2-benzoyl-1H-pyrrolo[2,3-*b*]pyridine-1-carboxamide (4n)**

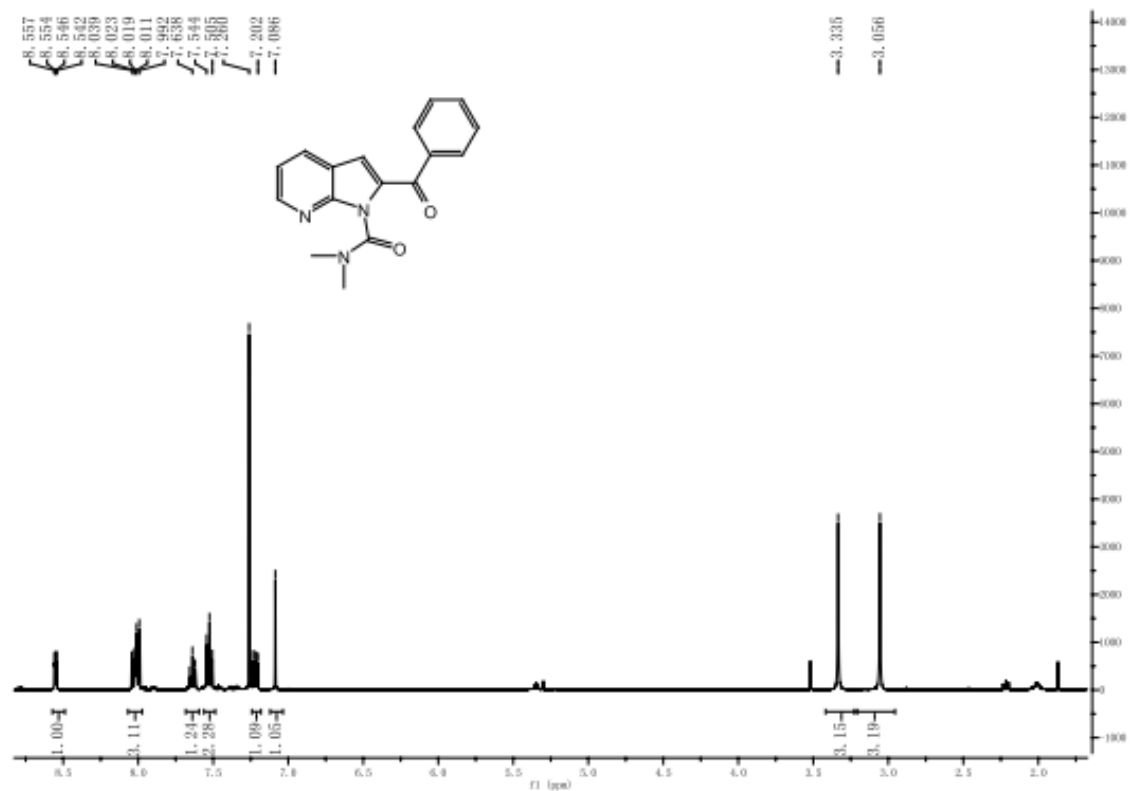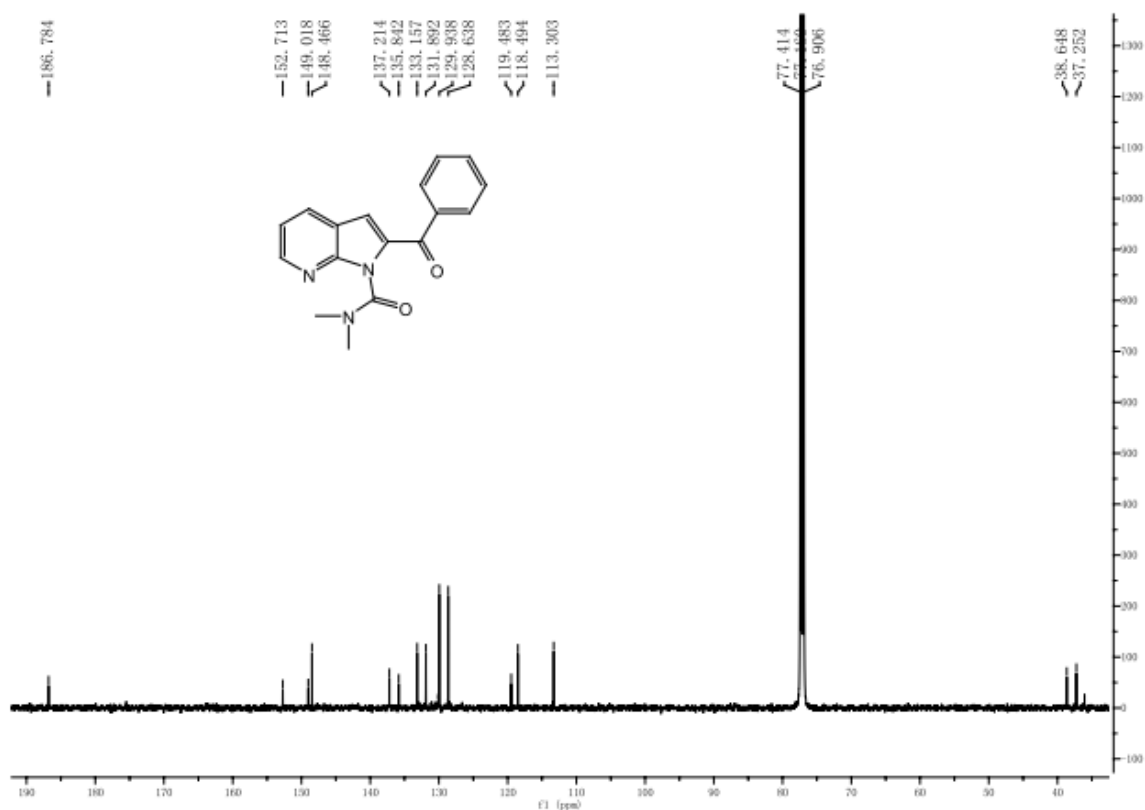

### Indol-2-yl phenyl ketone (3a-1)

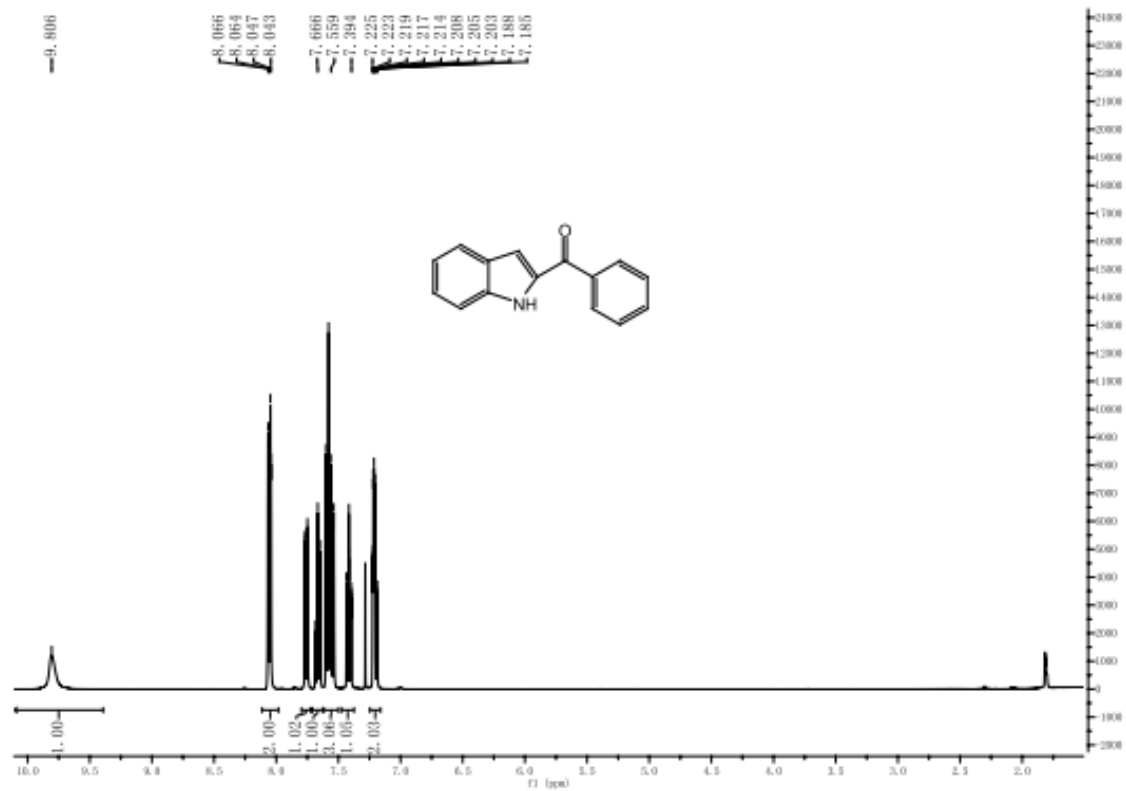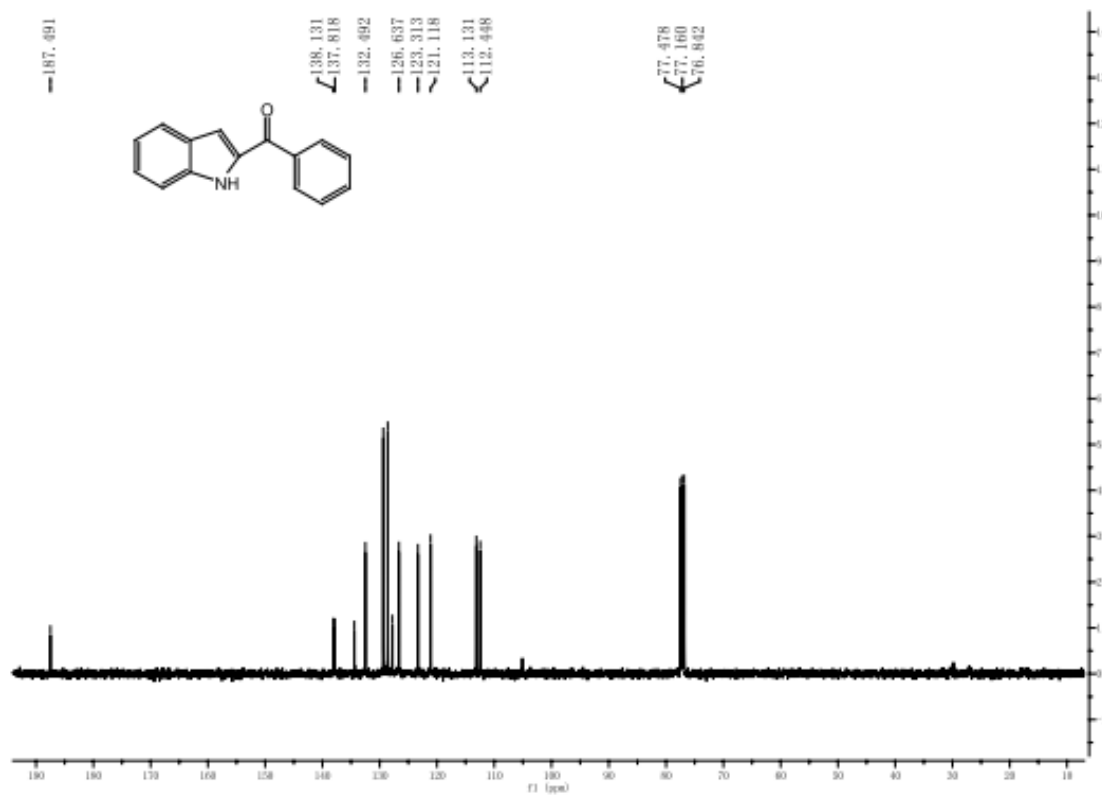

Supplement: c2cc31351k.pdf [file c2cc31351k.pdf]
